# Supplementary material
Source: PubMed Central journal article supplement (PMC6460420)
Supplement: blood872549-suppl1.pdf [file blood872549-suppl1.pdf]

## Supplemental Materials and Methods

### Patient materials and T-Cell lines

One hundred and nineteen PTCL cases were included in the study (35 AITL, 69 PTCL-NOS, and 15 PTCL- $T_{FH}$ ). Twenty-nine were formalin fixed paraffin embedded (FFPE)<sup>1</sup>, with the remaining samples being fresh frozen (FF). PTCL specimens were collected from the Nebraska Lymphoma Study Group (NLSG) registry and Tissue Bank, the International Peripheral T-cell Lymphoma (IPTCL) Consortium, or from generous collaborations. Twenty-five of the PTCL-NOS cases from a previous study<sup>2</sup> had corresponding CGH data and GEP data that allowed for GATA3/TBX21 subgroup classification. For three PTCL-NOS cases, CNAs were obtained from next generation sequencing (NGS) data<sup>3</sup> and included in **Figure-6**. The clinical and pathological characteristics are tabulated in **Table-S1**. **Table-S1** shows detailed information regarding sample description, aCGH platform, molecular classification, ABSOLUTE (V1.0.06) purity, and immunohistochemistry (IHC) data. One hundred and five of the cases were included in previous profiling studies<sup>1,2,4,5</sup> and were reviewed by at least two pathologists to reach a consensus diagnosis. Additional PTCL series were included for comparative analysis<sup>6-10</sup>. This study was approved by the Institutional Review Board of the University of Nebraska Medical Center.

Four T-cell lines representative of lymphoblastic leukemia (Jurkat), Sezary Syndrome (HuT78), CTCL/ALCL ALK- (MAC-1<sup>11,12</sup>), and a mature CD4<sup>+</sup>CD8<sup>+</sup> T-cell lymphoma (T8ML1<sup>13</sup>) were used in the study. These T-cell lines were cultured in 2.05mM L-Glutamine supplemental RPMI 1640 (HyClone) (T8ML1, MAC-1, Jurkat) or IMDM (HuT78), supplemented with 10% or 20% fetal bovine serum (FBS) respectively, penicillin G (199 U/ml) and streptomycin (100 µg/ml). T8ML1 was further supplemented with IL-2 (10 ng/ml). Cell cultures were maintained at 37°C in 5% CO<sub>2</sub>. All cell lines underwent routine mycoplasma testing using the Universal Mycoplasma Detection Kit (ATCC), with the most recent testing completed on August 17, 2017. Approximately, four passages of the cells occurred between thawing and experimental use. The T8ML1 cell line was generously provided from Hiroshi Fujiwara, whom was involved in establishing the cell line<sup>13</sup>. MAC-1 was originally established by Marshall Kadin<sup>14</sup>. Both Jurkat and HuT78 were previously purchased from ATCC. The status of *PTEN* and *TP53* mutation and copy number are indicated in **Table-S2**.

### Molecular classification of cases with FFPE-derived GEP and RNA-seq

Sixty-three cases had previously undergone molecular classification according to the gene signatures previously described<sup>4,5</sup>. The remaining cases were classified using the Affymetrix U133 Plus2 data, RNA-seq data, or Illumina DASL mRNA expression data and the same gene signatures and Bayesian algorithm described in the previous publications<sup>4,5</sup>.

RNA-sequencing (RNA-seq) on an additional nine AITL cases classified by morphology and immunohistochemistry (IHC) was performed using RNA-TruSeq mRNA Library Preparation Kits (Illumina, San Diego, CA, USA) and an Illumina HiSeq 2000 sequencer. Tophat, Cufflinks, and Cuffdiff<sup>15</sup> were used for alignment, read counting, and generation of FPKM values. We used a pre-defined AITL mRNA signature derived from a well-characterized histopathological AITL training cohort from earlier studies<sup>4,5</sup> and using the

Bayesian algorithm validated eight (of nine) new AITL cases having a high probability ( $>0.80$ ) with the AITL signature and thus were included in this study.

The Affymetrix HG-U133 Plus2 data from PTCL-GATA3 and PTCL-TBX21 cases from a previous study<sup>5</sup> was imported into BRB array tools (<https://brb.nci.nih.gov/BRB-ArrayTools/>) and MAS5.0 normalized, as previously described<sup>5</sup>. Data on the Illumina DASL platform from a previous study<sup>1</sup> was separately imported and normalized using BRB ArrayTools. The normalized data from each array platform was exported and the maximally expressed probe set was selected for each gene. The data from the two platforms were merged and the two platforms were cross-platform normalized using the empirical Bayes method (ComBat)<sup>16</sup>. For individual arrays, the correlation between probe set values before and after combat was approximately 0.8-0.98. We re-examined each transcript that was included in the original signature<sup>5</sup> and present in both platforms and selected the transcripts that expressed a positive correlation with the classifier's mean in the FFPE data. The classifier genes were then used for Bayesian classification in FFPE cases, with the HG-U133 Plus2 cases of known classification serving as a training set, as performed in previous studies<sup>4,5</sup>. The cases were classified, if it showed  $>80\%$  probability of belonging to one subgroup versus other groups as shown in previous studies<sup>4,5</sup>. Additionally, we also performed unsupervised hierarchical clustering using the classifier genes in the cases included in the CNA study and confirmed that there were two main clusters, one dominated by PTCL-GATA3 cases and one dominated by PTCL-TBX21 cases (data not shown), indicating the magnitude of the differential expression of the classifier genes can tolerate the platform differences.

### **DNA copy number analysis**

Genomic DNA was previously extracted from FF tissues using the AllPrep DNA/RNA kit (Qiagen) and from FFPE samples using AllPrep DNA/RNA FFPE kit (Qiagen). Three different SNP array platforms (Nsp1 SNP 250K, SNP 6.0 and OncoScan, Affymetrix) were used for copy number (CN) analysis together with previously published Agilent SurePrint aCGH data<sup>2</sup>. DNA libraries were generated according to the manufacturer's recommendations specific to each platform. Specifically for the OncoScan platform, two raw .CEL files are generated, one for the "AT" array and a second for the "GC" array. The .CEL files are combined in OncoScan Console (Affymetrix) to generate a single .OSCHP file. Briefly, the generation of the .OSCHP file entails calculating the log<sub>2</sub> ratio, allelic difference and B-allele frequency (BAF), then identifying normal diploid regions. Based on the normal diploid regions, the log<sub>2</sub> ratio, allelic difference, and BAF are recomputed if necessary. Visualization of the copy number abnormalities (CNAs) was performed with Nexus Copy Number™ software (Bio Discovery, El Segundo, CA, USA) which enables multiple platform analysis using the SNP-FASST2 algorithm. For cases with paired normal (11 AITL on SNP 6.0), Nexus Copy Number enables the combined import of tumor and normal sample. The gain and loss thresholds were set at a log<sub>2</sub> ratio of 0.06 and -0.06, respectively. Raw data from deposited CEL files from published studies<sup>8,10</sup> were analyzed using the SNP-FASST2 algorithm with default settings. Segmentation files for the published ALCL study<sup>6</sup> were observed. The percent aberrant genome per case was calculated by taking the total size of the aberrant regions divided by the total size of the genome for chromosomes 1-22. Frequencies of gains and losses along the

chromosomes were calculated by Nexus and moving average smoothing at 5 Mb was applied for CNA frequency along the chromosome plots.

### **Integrative analysis of CNAs with GEP**

Total RNA isolated from FF and FFPE PTCL cases was previously used to obtain GEP data (Affymetrix HG-U133 Plus2 and Illumina DASL) and was included in previous studies<sup>1,2,4,5</sup>. For each gene the probeset with the maximal expression was used. For cases with GEP data on the Affymetrix HG-U133 Plus2, we compared the average mRNA expression level of genes against CN status (gain/amplification, heterozygous/homozygous loss, 2N) using one-sided Student's t-test to determine significance. Ingenuity pathway analysis (IPA) program (Qiagen, Inc) or DAVID v6.8 (<https://david.ncifcrf.gov/>) was used for the molecular and functional annotation of the genes within aberrant regions, and only pathways with  $p < 0.05$  and an  $FDR < 0.25$  were included in the discussion.

### **Unsupervised hierarchical clustering**

Unsupervised hierarchical clustering of molecularly classified PTCL-NOS cases was performed using the CN status of abnormalities identified at a frequency  $\geq 10\%$  in either the PTCL-GATA3 or PTCL-TBX21 subgroups. An arm was considered lost or gained accordingly if at least 25% of the arm displayed the aberration. Clustering was performed using Cluster 3.0 (correlation (centered)) similarity metric and average linkage, <http://bonsai.hgc.jp/~mdehoon/software/cluster/software.htm>). The two validation cohorts were clustered similarly based on the abnormalities identified in the molecularly classified/training series. Correlation of CNAs among cases was performed using Pearson correlation and the R-language "corrplot" package.

### **NanoString nCounter v2 Cancer CN Assay**

The v2 Cancer CN Assay provides analysis of 87 genes commonly found aberrant in cancer and has been optimized for the use of FFPE samples as well. Fifty-four probes targeting invariant regions are also included as controls. DNA (500 ng) was fragmented with AluI restriction enzyme followed by a 24 hour hybridization per the manufacturer. Post-hybridization purification was performed by the nCounter Prep Station followed by image acquisition at maximum sensitivity on the nCounter Digital Analyzer. Subsequent analysis was completed using nSolver Analysis Software 3.0 as suggested per the manufacturer.

### **Genomic sequencing and analysis**

A custom panel targeting 334 genes recurrently mutated in non-Hodgkin lymphomas (NHLs) was previously designed using the Agilent SureSelect platform. Fifteen-18 samples were sequenced per lane on an Illumina HiSeq2500 sequencer for an average of 268-fold coverage of targeted regions. Adapter sequences were trimmed using trimmomatic (v0.36). Raw reads were mapped to the human genome (hg19) using the Burrows-Wheeler Aligner-MEM (v0.7.15). Genome Analysis Toolkit (v3.6) was used for local realignment and base quality recalibration. Duplicate marking was done with Picard (v2.4.1). Variant calling and filtering were performed with VarScan 2 (v2.4.0) and Genome Analysis Toolkit UnifiedGenotyper. The variants were

annotated using Annovar (<http://annovar.openbioinformatics.org>). Variant filters applied included requiring that variants should be supported by at least four reads with a minimal variant allelic frequency of 5% with variant reads on the plus and minus strand. Variants were excluded if they 1) existed in the dbSNP138NotFlagged database (<http://annovar.openbioinformatics.org/en/latest/user-guide/filter>); 2) were in a regions of segmental duplication (SuperDups, Annovar); 3) did not change protein sequences or affect splice sites; 4) were recurrent in a set of 92 unrelated normal samples; or 5) were shared by >10 cases unless they are from a gene known to have frequent mutations and thus present in the COSMIC database.

### **Overall survival outcome analysis**

The overall survival (OS; death from any cause) was estimated using the Kaplan-Meier method, and differences assessed using the log-rank test. Statistical analyses were performed with the R-language survival package. Differences among groups were considered significant at p-values below 0.05 (\*).

### **PrestoBlue assay**

Jurkat, T8ML1, MAC-1, and HuT78 cell lines were treated with different concentrations of Torin 1 (10189-392, BioVision) (100, 200 and 300 nM), Torin 2 (2274-5, BioVision) (10, 20, 40, 60 and 100 nM), and Temsirolimus (TEM) (Chemscene) (1, 2, 3, 4, and 5  $\mu$ M) for 24 hours. Sensitivity to drug treatment in the four cell lines was assayed in 96 well plates using PrestoBlue™ Cell Viability Reagent (Invitrogen -A13261) per manufacture's protocol and read on a Tecan Infinite M200Pro.

### **Western blotting**

Jurkat, T8ML1, MAC-1, and HuT78 cell lines were treated with Torin 1 (200 nM), Torin 2 (100 nM), or TEM (2  $\mu$ M) for 24 hours and then lysed in RIPA buffer (50 mM Tris, pH 7.4, 150 mM NaCl, 1% Triton X-100, 0.1% SDS, 1% sodium deoxycholate, 10 mM sodium 2-glycerolphosphate, 1 mM phenylmethylsulfonyl fluoride, 0.4 units/ml aprotinin, 1 mM sodium fluoride, and 0.1 mM sodium vanadate). Twenty to 100  $\mu$ G of whole-cell extracts were separated by sodium dodecyl sulfate-polyacrylamide gel electrophoresis and transferred to nitrocellulose (Bio-Rad) or polyvinylidene difluoride (Bio-Rad) membranes. Membranes were blocked in Odyssey Blocking Buffer (LI-COR) or Tris buffered saline with 0.1% Tween and 5% milk at room temperature for 30 minutes to 1 hour and then incubated with primary antibody specific to pAKT (S473) (#4060;CST), pAKT (Thr308) (#13038;CST), total AKT (#4691;CST), p4EBP1 (#2855;CST), p-RPS6 (#4858;CST), caspase-3 (#9661;CST), and  $\beta$ -actin (#1616;SC) at 4°C overnight, followed by treatment with secondary antibodies.

### **Genomic status of *PTEN* and *TP53***

The genomic DNA from T-cell lines was used to quantify the DNA copy number of *PTEN* and *TP53* in comparison to *RPL13A*, and tonsillar DNA was used as a calibrator (normal). Two Burkitt Lymphoma (BL) cell lines (Raji and Namalwa) were included as positive controls. The qPCR experiment was performed using SYBR Green qPCR Kit (Bio Rad. Inc) using primers listed in **Table-S2**. The standard  $\Delta\Delta$  CT (CT (*PTEN* or *TP53*)-CT (*RPL13A*)) method was used to estimate the status of the genomic locus.

## References

1. Piccaluga PP, Fuligni F, De Leo A, Bertuzzi C, Rossi M, Bacci F, et al. Molecular profiling improves classification and prognostication of nodal peripheral T-cell lymphomas: results of a phase III diagnostic accuracy study. *J Clin Oncol*. 2013;31(24):3019-3025.
2. Dobay MP, Lemonnier F, Missiaglia E, Bastard C, Vallois D, Jais JP, et al. Integrative clinicopathological and molecular analyses of angioimmunoblastic T-cell lymphoma and other nodal lymphomas of follicular helper T-cell origin. *Haematologica*. 2017;102(4):e148-e151.
3. Kuilman T, Velds A, Kemper K, Ranzani M, Bombardelli L, Hoogstraat M, et al. CopywriteR: DNA copy number detection from off-target sequence data. *Genome Biol*. 2015;16:49.
4. Iqbal J, Weisenburger DD, Greiner TC, Vose JM, McKeithan T, Kucuk C, et al. Molecular signatures to improve diagnosis in peripheral T-cell lymphoma and prognostication in angioimmunoblastic T-cell lymphoma. *Blood*. 2010;115(5):1026-1036.
5. Iqbal J, Wright G, Wang C, Rosenwald A, Gascoyne RD, Weisenburger DD, et al. Gene expression signatures delineate biological and prognostic subgroups in peripheral T-cell lymphoma. *Blood*. 2014;123(19):2915-2923.
6. Boi M, Rinaldi A, Kwee I, Bonetti P, Todaro M, Tabbo F, et al. PRDM1/BLIMP1 is commonly inactivated in anaplastic large T-cell lymphoma. *Blood*. 2013;122(15):2683-2693.
7. Hartmann S, Gesk S, Scholtysik R, Kreuz M, Bug S, Vater I, et al. High resolution SNP array genomic profiling of peripheral T cell lymphomas, not otherwise specified, identifies a subgroup with chromosomal aberrations affecting the REL locus. *British journal of haematology*. 2010;148(3):402-412.
8. Lin WM, Lewis JM, Filler RB, Modi BG, Carlson KR, Reddy S, et al. Characterization of the DNA copy-number genome in the blood of cutaneous T-cell lymphoma patients. *The Journal of investigative dermatology*. 2012;132(1):188-197.
9. Nakagawa M, Nakagawa-Oshiro A, Karnan S, Tagawa H, Utsunomiya A, Nakamura S, et al. Array comparative genomic hybridization analysis of PTCL-U reveals a distinct subgroup with genetic alterations similar to lymphoma-type adult T-cell leukemia/lymphoma. *Clin Cancer Res*. 2009;15(1):30-38.
10. Yamagishi M, Nakano K, Miyake A, Yamochi T, Kagami Y, Tsutsumi A, et al. Polycomb-mediated loss of miR-31 activates NIK-dependent NF-kappaB pathway in adult T cell leukemia and other cancers. *Cancer cell*. 2012;21(1):121-135.
11. Ehrentraut S, Schneider B, Nagel S, Pommerenke C, Quentmeier H, Geffers R, et al. Th17 cytokine differentiation and loss of plasticity after SOCS1 inactivation in a cutaneous T-cell lymphoma. *Oncotarget*. 2016;7(23):34201-34216.
12. Piva R, Pellegrino E, Mattioli M, Agnelli L, Lombardi L, Boccalatte F, et al. Functional validation of the anaplastic lymphoma kinase signature identifies CEBPB and BCL2A1 as critical target genes. *The Journal of clinical investigation*. 2006;116(12):3171-3182.
13. An J, Fujiwara H, Suemori K, Niiya T, Azuma T, Tanimoto K, et al. Activation of T-cell receptor signaling in peripheral T-cell lymphoma cells plays an important role in the development of lymphoma-associated hemophagocytosis. *International journal of hematology*. 2011;93(2):176-185.
14. Kadin ME, Cavaille-Coll MW, Gertz R, Massague J, Cheifetz S, George D. Loss of receptors for transforming growth factor beta in human T-cell malignancies. *Proc Natl Acad Sci U S A*. 1994;91(13):6002-6006.
15. Trapnell C, Roberts A, Goff L, Pertea G, Kim D, Kelley DR, et al. Differential gene and transcript expression analysis of RNA-seq experiments with TopHat and Cufflinks. *Nat Protoc*. 2012;7(3):562-578.
16. Johnson WE, Li C, Rabinovic A. Adjusting batch effects in microarray expression data using empirical Bayes methods. *Biostatistics*. 2007;8(1):118-127.

Table-S1: Case IDs and corresponding data. Cases indicated with "\*" in the first column were sequenced.

| Case        | Classification | CN Platform       | Previously Published CN Data | GEP Platform            | GEO Deposited GEP   | Previously Published GEP | CN Tissue Source | % Large Neoplastic T-cell | Absolute Purity | CD3 | CD4 | CD8 | CD30        | CD10    | PD1  | CXCL13 | ICOS | CCR5 | SAP | BCL6 |                                             |
|-------------|----------------|-------------------|------------------------------|-------------------------|---------------------|--------------------------|------------------|---------------------------|-----------------|-----|-----|-----|-------------|---------|------|--------|------|------|-----|------|---------------------------------------------|
| AITL1       | AITL           | OncoScan          | No                           | HG-U133 Plus2           | GSM472085           | Yes*                     | Fresh Frozen     | 22.5                      | 24.00%          | +   | +   | -   |             | +       |      |        |      |      |     |      |                                             |
| AITL2       | AITL           | OncoScan          | No                           | HG-U133 Plus2           | GSM472137           | Yes*                     | Fresh Frozen     | 45                        | 24.00%          | +   | +   | -   |             | -       |      |        |      |      |     |      |                                             |
| AITL3       | AITL           | OncoScan          | No                           | HG-U133 Plus2           | GSM1411444          | Yes*                     | Fresh Frozen     | 22.00%                    | 22.00%          | +   | +   | -   |             | Partial |      | +      |      |      |     |      |                                             |
| AITL4       | AITL           | OncoScan          | No                           | HG-U133 Plus2           | GSM1411340          | Yes*                     | Fresh Frozen     | 18.00%                    | 18.00%          | +   | +   | -   |             |         |      |        |      |      |     | +    |                                             |
| AITL5       | AITL           | OncoScan          | No                           | HG-U133 Plus2           | GSM472142           | Yes*                     | Fresh Frozen     | 62.5                      | 23.00%          | +   | +   | -   | +           |         |      |        |      |      |     |      |                                             |
| AITL6       | AITL           | OncoScan          | No                           | HG-U133 Plus2           | GSM1411347          | Yes*                     | Fresh Frozen     | 21.00%                    | 21.00%          | +   | +   | -   |             |         |      |        |      |      |     |      |                                             |
| AITL7       | AITL           | OncoScan          | No                           | HG-U133 Plus2           | GSM1411304          | Yes*                     | Fresh Frozen     | 19.00%                    | 19.00%          | +   | +   | -   | Weak        | Weak    | Weak |        |      |      |     |      |                                             |
| AITL8       | AITL           | OncoScan          | No                           | HG-U133 Plus2           | GSM1411296          | Yes*                     | Fresh Frozen     | 31.00%                    | 31.00%          | +   | +   | -   |             | Weak    | Weak | Weak   | +    |      |     |      |                                             |
| AITL9       | AITL           | OncoScan          | No                           | HG-U133 Plus2           | GSM1411443          | Yes*                     | Fresh Frozen     | 18.00%                    | 18.00%          | +   | +   | -   |             | Partial |      |        |      |      |     |      |                                             |
| AITL10      | AITL           | OncoScan          | No                           | HG-U133 Plus2           | GSM1411462          | Yes*                     | Fresh Frozen     | 15.00%                    | 15.00%          | +   | +   | -   |             |         | -    | +      |      |      |     |      |                                             |
| AITL11      | AITL           | OncoScan          | No                           | HG-U133 Plus2           | GSM1411344          | Yes*                     | Fresh Frozen     | 18.00%                    | 18.00%          | +   | +   | -   |             |         |      |        |      |      |     |      |                                             |
| AITL12      | AITL           | OncoScan          | No                           | HG-U133 Plus2           | Pending GEO Deposit | No                       | Fresh Frozen     | 80                        | 18.00%          | -   |     |     |             |         |      |        |      |      |     |      |                                             |
| AITL13      | AITL           | OncoScan          | No                           | HG-U133 Plus2           | GSM1411365          | Yes*                     | Fresh Frozen     | 70                        | 25.00%          | +   | +   | -   |             |         |      |        |      |      |     |      |                                             |
| AITL14      | AITL           | OncoScan          | No                           | HG-U133 Plus2           | Pending GEO Deposit | No                       | Fresh Frozen     | 22.00%                    | 22.00%          | +   | -   | -   | +           |         | +    |        |      |      |     |      |                                             |
| AITL15      | AITL           | OncoScan          | No                           | HG-U133 Plus2           | GSM1411308          | Yes*                     | Fresh Frozen     | 21.00%                    | 21.00%          | +   | +   | -   |             |         | -    | Weak   |      |      |     |      |                                             |
| AITL16      | AITL           | OncoScan          | No                           | HG-U133 Plus2           | GSM1411362          | Yes*                     | Fresh Frozen     | 43.00%                    | 43.00%          | +   | +   | -   |             |         |      |        |      |      |     |      |                                             |
| AITL17      | AITL           | OncoScan          | No                           | HG-U133 Plus2           | GSM1411300          | Yes*                     | Fresh Frozen     | 17.00%                    | 17.00%          | +   | +   | -   | Weak        |         |      |        |      |      |     |      |                                             |
| AITL18      | AITL           | OncoScan          | No                           | HG-U133 Plus2           | GSM1411303          | Yes*                     | Fresh Frozen     | 18.00%                    | 18.00%          | +   | +   | -   | Weak        |         |      |        |      |      |     |      |                                             |
| AITL19      | AITL           | OncoScan          | No                           | HG-U133 Plus2           | GSM1411305          | Yes*                     | Fresh Frozen     | 23.00%                    | 23.00%          | +   | +   | -   |             |         |      |        |      |      |     |      |                                             |
| AITL20      | AITL           | OncoScan          | No                           | HG-U133 Plus2           | GSM1411463          | Yes*                     | Fresh Frozen     | 20.00%                    | 20.00%          | +   | +   | -   |             |         |      |        |      |      |     |      |                                             |
| AITL21      | AITL           | SNP 250K          | No                           | HG-U133 Plus2           | Pending GEO Deposit | No                       | Fresh Frozen     | 50                        | 30.00%          | +   | +   | -   |             |         |      |        |      |      |     |      |                                             |
| AITL22      | AITL           | SNP 250K          | No                           | HG-U133 Plus2           | GSM472083           | Yes*                     | Fresh Frozen     | 40                        | 28.00%          | +   |     | -   |             |         |      |        |      |      |     |      |                                             |
| AITL23      | AITL           | SNP 250K          | No                           | HG-U133 Plus2           | Pending GEO Deposit | No                       | Fresh Frozen     | 40                        | 25.00%          | +   | +   | -   |             |         | +    |        |      |      |     |      |                                             |
| AITL24      | AITL           | SNP 250K          | No                           | HG-U133 Plus2           | GSM472086           | Yes*                     | Fresh Frozen     | 32.5                      | 38.00%          | +   |     | -   |             |         | +    |        |      |      |     |      |                                             |
| AITL25      | AITL           | SNP 250K          | No                           | HG-U133 Plus2           | GSM1411348          | Yes*                     | Fresh Frozen     | 24.00%                    | 24.00%          | +   | +   | -   |             |         | +    |        |      |      |     |      |                                             |
| AITL26      | AITL           | SNP 250K          | No                           | HG-U133 Plus2           | GSM1411356          | Yes*                     | Fresh Frozen     | 30                        | 23.00%          | +   | +   | -   |             |         | +    |        |      |      |     |      |                                             |
| AITL27      | AITL           | SNP 250K          | No                           | HG-U133 Plus2           | GSM472062           | Yes*                     | Fresh Frozen     | 50                        | 35.00%          | +   | +   | -   |             |         |      |        |      |      |     |      |                                             |
| AITL28      | AITL           | SNP 6.0           | No                           | RNA-Sequencing Illumina | Pending Deposit     | No                       | Fresh Frozen     | 80                        | 18.00%          | +   | +   | -   |             |         |      | +      |      |      |     | +    |                                             |
| AITL29      | AITL           | SNP 6.0           | No                           | RNA-Sequencing Illumina | Pending Deposit     | No                       | Fresh Frozen     | 80                        | 50.00%          | +   | +   | -   |             |         |      | -      | +    |      |     | +    |                                             |
| AITL30      | AITL           | SNP 6.0           | No                           | RNA-Sequencing Illumina | Pending Deposit     | No                       | Fresh Frozen     | 80                        | 27.00%          | +   | +   | -   | + Scattered |         |      | -      | +    |      |     | +    |                                             |
| AITL31      | AITL           | SNP 6.0           | No                           | RNA-Sequencing Illumina | Pending Deposit     | No                       | Fresh Frozen     | 27.00%                    | 27.00%          | +   | +   | -   |             |         |      |        |      |      |     |      |                                             |
| AITL32      | AITL           | SNP 6.0           | No                           | RNA-Sequencing Illumina | Pending Deposit     | No                       | Fresh Frozen     | 18.00%                    | 18.00%          | +/- | +   | -   |             |         |      |        |      |      |     |      |                                             |
| AITL33      | AITL           | SNP 6.0           | No                           | RNA-Sequencing Illumina | Pending Deposit     | No                       | Fresh Frozen     | 66.00%                    | 66.00%          | +   | +   | -/+ |             |         | -/+  | +      |      |      |     |      |                                             |
| AITL34      | AITL           | SNP 6.0           | No                           | RNA-Sequencing Illumina | Pending Deposit     | No                       | Fresh Frozen     | 21.00%                    | 21.00%          | +   | +   | -   |             |         |      | +/-    | +    |      |     | +    |                                             |
| AITL35      | AITL           | SNP 6.0           | No                           | RNA-Sequencing Illumina | Pending Deposit     | No                       | Fresh Frozen     | 80                        | 24.00%          | +/- | +   | -   |             |         |      | +      |      |      |     |      |                                             |
| PTCL-NOS1*  | PTCL-GATA3     | OncoScan          | No                           | DASL Illumina           | PTCL NOS 028        | Yes*                     | FFPE             | 18.00%                    | 18.00%          | +   | +   | +   |             |         |      |        |      |      |     | -    |                                             |
| PTCL-NOS2*  | PTCL-GATA3     | OncoScan          | No                           | DASL Illumina           | PTCL NOS 039        | Yes*                     | FFPE             | 16.00%                    | 16.00%          | +   | +   | -/+ | -/+         |         |      |        |      |      |     |      | -                                           |
| PTCL-NOS3*  | PTCL-GATA3     | OncoScan          | No                           | DASL Illumina           | PTCL NOS 041        | Yes*                     | FFPE             | 20.00%                    | 20.00%          | +   | -/+ | -   |             |         |      |        |      |      |     |      | -                                           |
| PTCL-NOS4   | PTCL-GATA3     | OncoScan          | No                           | DASL Illumina           | PTCL NOS 037        | Yes*                     | FFPE             | 23.00%                    | 23.00%          | +   | +   | -   |             |         |      |        |      |      |     |      | -                                           |
| PTCL-NOS5*  | PTCL-GATA3     | OncoScan          | No                           | DASL Illumina           | PTCL NOS 034        | Yes*                     | FFPE             | 26.00%                    | 26.00%          | +   | +   | -   | +/-         |         |      |        |      |      |     |      | -                                           |
| PTCL-NOS6*  | PTCL-GATA3     | OncoScan          | No                           | DASL Illumina           | PTCL NOS 064        | Yes*                     | FFPE             | 23.00%                    | 23.00%          | +   | -   | +   |             |         |      |        |      |      |     |      | Rare+                                       |
| PTCL-NOS7*  | PTCL-GATA3     | OncoScan          | No                           | DASL Illumina           | PTCL NOS 065        | Yes*                     | FFPE             | 70.00%                    | 70.00%          | +   | +   | -   |             |         |      |        |      |      |     |      | Rare+                                       |
| PTCL-NOS8   | PTCL-GATA3     | Agilent SurePrint | Yes*                         | HG-U133 Plus2           | Yes*                | Yes*                     | Fresh Frozen     | 31.00%                    | 31.00%          |     |     |     |             |         |      |        |      |      |     |      | Reviewed in Dobay et al. Haematologica 2017 |
| PTCL-NOS9   | PTCL-GATA3     | Agilent SurePrint | Yes*                         | HG-U133 Plus2           | Yes*                | Yes*                     | Fresh Frozen     | 42.00%                    | 42.00%          |     |     |     |             |         |      |        |      |      |     |      | Reviewed in Dobay et al. Haematologica 2017 |
| PTCL-NOS10  | PTCL-GATA3     | Agilent SurePrint | Yes*                         | HG-U133 Plus2           | Yes*                | Yes*                     | Fresh Frozen     | 28.00%                    | 28.00%          |     |     |     |             |         |      |        |      |      |     |      | Reviewed in Dobay et al. Haematologica 2017 |
| PTCL-NOS11  | PTCL-GATA3     | Agilent SurePrint | Yes*                         | HG-U133 Plus2           | Yes*                | Yes*                     | Fresh Frozen     | 27.00%                    | 27.00%          |     |     |     |             |         |      |        |      |      |     |      | Reviewed in Dobay et al. Haematologica 2017 |
| PTCL-NOS12  | PTCL-GATA3     | Agilent SurePrint | Yes*                         | HG-U133 Plus2           | Yes*                | Yes*                     | Fresh Frozen     | 68.00%                    | 68.00%          |     |     |     |             |         |      |        |      |      |     |      | Reviewed in Dobay et al. Haematologica 2017 |
| PTCL-NOS13  | PTCL-GATA3     | Agilent SurePrint | Yes*                         | HG-U133 Plus2           | Yes*                | Yes*                     | Fresh Frozen     | 29.00%                    | 29.00%          |     |     |     |             |         |      |        |      |      |     |      | Reviewed in Dobay et al. Haematologica 2017 |
| PTCL-NOS14  | PTCL-GATA3     | Agilent SurePrint | Yes*                         | HG-U133 Plus2           | Yes*                | Yes*                     | Fresh Frozen     | 70.00%                    | 70.00%          |     |     |     |             |         |      |        |      |      |     |      | Reviewed in Dobay et al. Haematologica 2017 |
| PTCL-NOS15  | PTCL-GATA3     | Agilent SurePrint | Yes*                         | HG-U133 Plus2           | Yes*                | Yes*                     | Fresh Frozen     | 29.00%                    | 29.00%          |     |     |     |             |         |      |        |      |      |     |      | Reviewed in Dobay et al. Haematologica 2017 |
| PTCL-NOS16  | PTCL-GATA3     | Agilent SurePrint | Yes*                         | HG-U133 Plus2           | Yes*                | Yes*                     | Fresh Frozen     | 30.00%                    | 30.00%          |     |     |     |             |         |      |        |      |      |     |      | Reviewed in Dobay et al. Haematologica 2017 |
| PTCL-NOS17* | PTCL-GATA3     | Not Available     | No                           | HG-U133 Plus2           | GSM472059           | Yes*                     | Fresh Frozen     | Not Available             | Not Available   |     |     |     |             |         |      |        |      |      |     |      |                                             |
| PTCL-NOS18* | PTCL-GATA3     | OncoScan          | No                           | HG-U133 Plus2           | GSM1411359          | Yes*                     | Fresh Frozen     | 50                        | 32.00%          | +   | +   | -   |             |         |      |        |      |      |     |      |                                             |
| PTCL-NOS19  | PTCL-GATA3     | OncoScan          | No                           | HG-U133 Plus2           | GSM472055           | Yes*                     | Fresh Frozen     | 30                        | 42.00%          | +   | +   | -   |             |         |      |        |      |      |     |      |                                             |
| PTCL-NOS20* | PTCL-GATA3     | OncoScan          | No                           | HG-U133 Plus2           | GSM1411372          | Yes*                     | Fresh Frozen     | 20                        | 28.00%          | +   |     | -   |             |         |      |        |      |      |     |      |                                             |
| PTCL-NOS21* | PTCL-GATA3     | OncoScan          | No                           | HG-U133 Plus2           | GSM472075           | Yes*                     | Fresh Frozen     | 70                        | 44.00%          | +   | +   | -   |             |         |      |        |      |      |     |      |                                             |
| PTCL-NOS22* | PTCL-GATA3     | OncoScan          | No                           | HG-U133 Plus2           | GSM1411455          | Yes*                     | Fresh Frozen     | 60                        | 35.00%          | +   | +   | -   |             |         |      |        |      |      |     |      |                                             |
| PTCL-NOS23* | PTCL-GATA3     | OncoScan          | No                           | HG-U133 Plus2           | GSM472156           | Yes*                     | Fresh Frozen     | 41.25                     | 46.00%          | +   | -   | -   | +           |         |      |        |      |      |     |      |                                             |
| PTCL-NOS24* | PTCL-GATA3     | OncoScan          | No                           | HG-U133 Plus2           | GSM472073           | Yes*                     | Fresh Frozen     | 20                        | 23.00%          | +   | +   | -   | +           |         |      |        |      |      |     |      |                                             |
| PTCL-NOS25* | PTCL-GATA3     | OncoScan          | No                           | HG-U133 Plus2           | GSM1411352          | Yes*                     | Fresh Frozen     | 15                        | 32.00%          | -   | +   | -   |             |         |      |        |      |      |     |      |                                             |
| PTCL-NOS26  | PTCL-GATA3     | OncoScan          | No                           | HG-U133 Plus2           | GSM1411338          | Yes*                     | Fresh Frozen     | 17.00%                    | 17.00%          |     |     |     |             |         |      |        |      |      |     |      |                                             |
| PTCL-NOS27  | PTCL-GATA3     | OncoScan          | No                           | HG-U133 Plus2           | GSM472071           | Yes*                     | Fresh Frozen     | 60                        | 32.00%          | +   | -   | -   |             |         |      |        |      |      |     |      |                                             |
| PTCL-NOS28* | PTCL-GATA3     | OncoScan          | No                           | HG-U133 Plus2           | GSM1411417          | Yes*                     | FFPE             | 80                        | 53.00%          |     |     |     |             |         |      |        |      |      |     |      | +                                           |
| PTCL-NOS29* | PTCL-GATA3     | OncoScan          | No                           | HG-U133 Plus2           | Pending GEO Deposit | No                       | Fresh Frozen     | 23.00%                    | 23.00%          | +   | +   | -   |             |         |      |        |      |      |     |      |                                             |
| PTCL-NOS30  | PTCL-GATA3     | OncoScan          | No                           | HG-U133 Plus2           | GSM1411295          | Yes*                     | FFPE             | 80                        | 39.00%          |     |     |     |             |         |      |        |      |      |     |      | +                                           |
| PTCL-NOS31  | PTCL-GATA3     | OncoScan          | No                           | HG-U133 Plus2           | GSM1411297          | Yes*                     | Fresh Frozen     | 29.00%                    | 29.00%          |     |     |     |             |         |      |        |      |      |     |      |                                             |
| PTCL-NOS32* | PTCL-GATA3     | OncoScan          | No                           | HG-U133 Plus2           | GSM1411428          | Yes*                     | FFPE             | 90                        | 23.00%          |     |     |     |             |         |      |        |      |      |     |      |                                             |
| PTCL-NOS33* | PTCL-NC        | OncoScan          | No                           | DASL Illumina           | PTCL NOS 030        | Yes*                     | FFPE             | 35.00%                    | 35.00%          | +   | -   | -   |             |         |      |        |      |      |     |      |                                             |
| PTCL-NOS34  | PTCL-NC        | Agilent SurePrint | Yes*                         | HG-U133 Plus2           | Yes*                | Yes*                     | Fresh Frozen     | 40.00%                    | 40.00%          |     |     |     |             |         |      |        |      |      |     |      | Reviewed in Dobay et al. Haematologica 2017 |
| PTCL-NOS35  | PTCL-NC        | Agilent SurePrint | Yes*                         | HG-U133 Plus2           | Yes*                | Yes*                     | Fresh Frozen     | 20.00%                    | 20.00%          |     |     |     |             |         |      |        |      |      |     |      | Reviewed in Dobay et al. Haematologica 2017 |
| PTCL-NOS36* | PTCL-NC        | OncoScan          | No                           | HG-U133 Plus2           | GSM472042           | Yes*                     | Fresh Frozen     | 7.5                       | 22.00%          | +   | +   | -   |             |         |      |        |      |      |     |      |                                             |
| PTCL-NOS37* | PTCL-NC        | OncoScan          | No                           | HG-U133 Plus2           | GSM1411361          | Yes*                     | Fresh Frozen     | 80                        | 22.00%          | +   | +   | -   |             |         |      |        |      |      |     |      | Partial                                     |
| PTCL-NOS38  | PTCL-TBX21     | OncoScan          | No                           | DASL Illumina           | PTCL NOS 032        | Yes*                     | FFPE             | 17.00%                    | 17.00%          | +   |     |     |             |         |      |        |      |      |     |      |                                             |



**Table S2: Genomic characteristics and primers used to evaluate four T-cell lymphoma cell lines.**

**TP53 and PTEN DNA CN status in 4 T-cell lymphoma cell lines normalized to the RPL13A housekeeping gene compared to tonsil.**

| <b>Cell Line</b> | <b>TP53 DNA CN</b> | <b>PTEN DNA CN</b> |
|------------------|--------------------|--------------------|
| Jurkat           | 2N                 | 2N                 |
| T8ML1            | 2N                 | Gain               |
| MAC-1            | 2N                 | 2N                 |
| HuT78            | Single Loss        | 2N                 |

**Mutation status of 4 T-cell lymphoma cells lines as collected from literature.**

| <b>Cell Line</b> | <b>TP53 Mutation Status</b> | <b>PTEN Mutation Status</b>    |
|------------------|-----------------------------|--------------------------------|
| Jurkat           | Nonsense, Splicing          | Frameshift Insertion; Missense |
| T8ML1            | Not Available               | Not Available                  |
| MAC-1            | No Evidence                 | No Evidence                    |
| HuT78            | Nonsense                    | None Reported                  |

**Primer sequences used to determine DNA CN status of PTEN and TP53.**

| <b>Gene</b> | <b>Direction</b> | <b>Sequence</b>             |
|-------------|------------------|-----------------------------|
| PTEN        | Forward          | 5'-CCACAAAGTGCCTCGTTTAC-3'  |
| PTEN        | Reverse          | 5'-GAAGGCAACTCTGCCAAATAC-3' |
| TP53        | Forward          | 5'-TGCTGCAAGAGGCAGAAA-3'    |
| TP53        | Reverse          | 5'-GTCAGTCGTGGAAGTGAGAAG-3' |



Table S3: Basic clinical characteristics of molecularly classified PTCL cases.

|                                 |                       | PTCL-NOS Molecular Subgroups |           |           |           |                |           |
|---------------------------------|-----------------------|------------------------------|-----------|-----------|-----------|----------------|-----------|
|                                 |                       | AITL                         | PTCL-NOS  | GATA3+    | TBX21+    | Unclassifiable | PTCL-TFH  |
|                                 | <b>Count in Study</b> | <b>35</b>                    | <b>67</b> | <b>32</b> | <b>30</b> | <b>5</b>       | <b>15</b> |
| <b>Age at Diagnosis (Years)</b> | <b>Median</b>         | 67                           | 65        | 68        | 65        | 58             | 61        |
|                                 | <b>Range</b>          | 45-87                        | 15-97     | 19-97     | 15-81     | 40-81          | 28-76     |
|                                 | <b>&lt;60</b>         | 5                            | 22        | 9         | 10        | 2              | 7         |
|                                 | <b>≥60</b>            | 30                           | 38        | 21        | 15        | 3              | 7         |
| <b>Gender</b>                   | <b>Male</b>           | 18                           | 42        | 24        | 13        | 5              | 9         |
|                                 | <b>Female</b>         | 17                           | 18        | 6         | 12        | 0              | 5         |

**Table S4: DAVID analysis of genes that were gained or amplified in AITL with concordant significantly increased mRNA expression.**

| Category     | Term                                                                                               | Count | %           | PValue      | Genes                                                               | List Total | FDR         |
|--------------|----------------------------------------------------------------------------------------------------|-------|-------------|-------------|---------------------------------------------------------------------|------------|-------------|
| BIOCARTA     | h_ptc1Pathway:Sonic Hedgehog (SHH) Receptor Ptc1<br>Regulates cell cycle                           | 4     | 0.672268908 | 0.004493931 | CCNB1, CCNH, CDK7, CDC25C                                           | 54         | 4.919954082 |
| KEGG_PATHWAY | hsa03015:mRNA surveillance pathway                                                                 | 8     | 1.344537815 | 0.0184916   | SYMPK, PPP2CA, PPP2CB, PPP2R5C, CPSF7, ETF1, PPP2R2B, DAZAP1        | 207        | 21.37137795 |
| KEGG_PATHWAY | hsa04071:Sphingolipid signaling pathway                                                            | 9     | 1.512605042 | 0.026527021 | S1PR2, SGPL1, PPP2CA, PPP2CB, PPP2R5C, SMPD1, MAPK9, NSMAF, PPP2R2B | 207        | 29.27202582 |
| KEGG_PATHWAY | hsa03018:RNA degradation                                                                           | 7     | 1.176470588 | 0.02679344  | CNOT8, EXOSC4, BTG3, LSM7, EXOSC5, SKIV2L2, EXOSC1                  | 207        | 29.52097072 |
| KEGG_PATHWAY | hsa04922:Glucagon signaling pathway                                                                | 8     | 1.344537815 | 0.0279187   | ATF4, PRMT1, ADCY2, PYGM, PGAM1, PDE3B, CREB3L1, SIK1               | 207        | 30.56353346 |
| KEGG_PATHWAY | hsa04110:Cell cycle                                                                                | 9     | 1.512605042 | 0.031456908 | CDKN1C, CCNB1, CCND1, CCNH, PTTG1, CDK7, SKP1, CDC25C, BUB3         | 207        | 33.74974927 |
| KEGG_PATHWAY | hsa04114:Oocyte meiosis                                                                            | 8     | 1.344537815 | 0.043714683 | PGR, ADCY2, PPP2CA, PPP2CB, PPP2R5C, PTTG1, SKP1, CDC25C            | 207        | 43.77460138 |
| KEGG_PATHWAY | hsa03008:Ribosome biogenesis in eukaryotes                                                         | 7     | 1.176470588 | 0.044828056 | GTPBP4, REXO2, SNU13, RPP30, NHP2, AK6, RIOK2                       | 207        | 44.61205261 |
| BIOCARTA     | h_cellcyclePathway:Cyclins and Cell Cycle Regulation                                               | 4     | 0.672268908 | 0.045404609 | CCNB1, CCND1, CCNH, CDK7                                            | 54         | 40.57742543 |
| BIOCARTA     | h_btg2Pathway:BTG family proteins and cell cycle regulation                                        | 3     | 0.504201681 | 0.047556018 | PRMT1, CCND1, CHAF1B                                                | 54         | 42.06040362 |
| BIOCARTA     | H_gsk3Pathway:Inactivation of Gsk3 by AKT causes accumulation of b-catenin in Alveolar Macrophages | 4     | 0.672268908 | 0.055175082 | IRAK1, CCND1, TOLLIP, PPP2CA                                        | 54         | 47.04531683 |

\*Only showing results with a false discovery rate (FDR) ≤50%.

**Table S5: DAVID analysis of genes located on chromosome 5 that were significantly highly expressed in AITL cases with a chromosome 5 gain.**

| Category     | Term                                                                  | Count | %           | PValue      | Genes                            | List Total | FDR         |
|--------------|-----------------------------------------------------------------------|-------|-------------|-------------|----------------------------------|------------|-------------|
| BIOCARTA     | h_ptc1Pathway:Sonic Hedgehog (SHH) Receptor Ptc1 Regulates cell cycle | 4     | 4.210526316 | 4.91813E-05 | CCNB1, CCNH, CDK7, CDC25C        | 13         | 0.046703684 |
| KEGG_PATHWAY | hsa04110:Cell cycle                                                   | 5     | 5.263157895 | 0.003732756 | CCNB1, CCNH, PTTG1, CDK7, CDC25C | 37         | 4.214429167 |
| KEGG_PATHWAY | hsa04914:Progesterone-mediated oocyte maturation                      | 4     | 4.210526316 | 0.010201251 | CCNB1, ADCY2, MAPK9, CDC25C      | 37         | 11.13546085 |
| BIOCARTA     | h_cellcyclePathway:Cyclins and Cell Cycle Regulation                  | 3     | 3.157894737 | 0.013651153 | CCNB1, CCNH, CDK7                | 13         | 12.2391434  |
| KEGG_PATHWAY | hsa04114:Oocyte meiosis                                               | 4     | 4.210526316 | 0.018689714 | ADCY2, PPP2CA, PTTG1, CDC25C     | 37         | 19.5249884  |
| BBID         | 80.T cell Activation                                                  | 3     | 3.157894737 | 0.035397661 | IL4, MAPK9, IL13                 | 6          | 23.9890314  |

\*Only showing results with a false discovery rate (FDR) ≤30%.

**Table S6: DAVID analysis of genes that were significantly highly expressed in AITL cases without a chromosome 5 gain**

| Category     | Term                                                               | Count | %           | PValue      | Genes                                                                                                                                                                                     | List Total | FDR         |
|--------------|--------------------------------------------------------------------|-------|-------------|-------------|-------------------------------------------------------------------------------------------------------------------------------------------------------------------------------------------|------------|-------------|
| KEGG_PATHWAY | hsa05202:Transcriptional misregulation in cancer                   | 20    | 2.400960384 | 5.38E-05    | CCNT2, ASPSCR1, PLAT, ERG, FLT3, RXRA, RELA, TGFBR2, IGF1, TSPAN7, MAX, CDKN1B, FLI1, ID2, ITGB7, ETV6, PBX3, RUNX2, CD14, KLF3                                                           | 285        | 0.069303339 |
| BIOCARTA     | h_nthiPathway:Nfkb activation by Nontypeable Hemophilus influenzae | 7     | 0.840336134 | 0.002673019 | MYD88, TGFBR1, RELA, CREBBP, TGFBR2, IL1B, IKKB                                                                                                                                           | 102        | 3.277490148 |
| KEGG_PATHWAY | hsa04060:Cytokine-cytokine receptor interaction                    | 20    | 2.400960384 | 0.00282763  | FLT3, TGFBR1, TGFBR2, KITLG, CXCR2, CXCL12, IL11RA, KDR, FLT3LG, IL12RB2, ACVR2B, TNFSF10, TNFRSF11A, TNFSF11, CLCF1, IL10RA, CX3CR1, IL1B, XCR1, GHR                                     | 285        | 3.584272546 |
| KEGG_PATHWAY | hsa04514:Cell adhesion molecules (CAMs)                            | 14    | 1.680672269 | 0.005443709 | NRXN2, CLDN5, CLDN11, HLA-B, HLA-E, ITGB1, NCAM1, SIGLEC1, ITGA6, ITGA8, ITGB7, CNTN1, HLA-DPB1, SELPLG                                                                                   | 285        | 6.794473631 |
| KEGG_PATHWAY | hsa05134:Legionellosis                                             | 8     | 0.960384154 | 0.006212373 | HSPA1L, CXCL1, MYD88, CXCL3, RELA, CXCL2, IL1B, CD14                                                                                                                                      | 285        | 7.718789281 |
| KEGG_PATHWAY | hsa04151:PI3K-Akt signaling pathway                                | 25    | 3.00120048  | 0.007689607 | ITGB5, KITLG, ITGB1, ITGB7, TEK, GHR, THBS4, RBL2, RELA, RXRA, IGF1, IRS1, KDR, VWF, CCND1, CDKN1B, ITGA6, LPAR6, ITGA8, TSC2, ITGA7, RELN, THEM4, IKKB                                   | 285        | 9.471459706 |
| KEGG_PATHWAY | hsa04640:Hematopoietic cell lineage                                | 10    | 1.200480192 | 0.007844491 | CD55, ITGA6, FLT3, KITLG, IL1B, ANPEP, CD14, IL11RA, CD1D, FLT3LG                                                                                                                         | 285        | 9.653433138 |
| KEGG_PATHWAY | hsa04068:FoxO signaling pathway                                    | 13    | 1.56062425  | 0.008829682 | CCND1, TNFSF10, S1PR1, CDKN1B, PLK3, RBL2, HOMER3, TGFBR1, CREBBP, TGFBR2, IGF1, IKKB, IRS1                                                                                               | 285        | 10.80305764 |
| KEGG_PATHWAY | hsa04512:ECM-receptor interaction                                  | 10    | 1.200480192 | 0.00910194  | VWF, ITGA6, ITGB7, ITGA8, ITGA7, ITGB5, SV2B, RELN, ITGB1, THBS4                                                                                                                          | 285        | 11.11836811 |
| KEGG_PATHWAY | hsa04064:NF-kappa B signaling pathway                              | 10    | 1.200480192 | 0.00910194  | TNFRSF11A, MYD88, TNFSF11, PTGS2, PLCG1, RELA, IL1B, IKKB, CXCL12, CD14                                                                                                                   | 285        | 11.11836811 |
| KEGG_PATHWAY | hsa04144:Endocytosis                                               | 20    | 2.400960384 | 0.009692945 | FGFR3, TGFBR1, TGFBR2, CXCR2, HLA-B, CYTH3, HLA-E, LDLRAP1, KDR, HSPA1L, RAB11FIP5, DAB2, ARRB2, WWP1, RAB5A, VPS4B, STAM, ARAP3, VPS36, EHD4                                             | 285        | 11.7992948  |
| KEGG_PATHWAY | hsa05200:Pathways in cancer                                        | 27    | 3.241296519 | 0.01046425  | FGFR3, PTGS2, KITLG, GLI2, CXCL12, ITGB1, FLT3LG, MAX, AGTR1, WNT10B, FLT3, RELA, TGFBR1, RXRA, CREBBP, TGFBR2, IGF1, APPL1, FZD4, FZD10, CCND1, CDKN1B, ITGA6, PLCG1, LPAR6, PTCH1, IKKB | 285        | 12.68071791 |
| KEGG_PATHWAY | hsa04510:Focal adhesion                                            | 17    | 2.040816327 | 0.010575003 | IGF1, ITGB5, ACTN2, CAPN2, ITGB1, KDR, VWF, CCND1, ARHGAP5, ITGA6, ITGA8, ITGB7, ITGA7, RELN, SHC1, PAK1, THBS4                                                                           | 285        | 12.80661344 |
| KEGG_PATHWAY | hsa04614:Renin-angiotensin system                                  | 5     | 0.600240096 | 0.013334134 | AGTR1, AGT, PRCF, CPA3, ANPEP                                                                                                                                                             | 285        | 15.89946006 |
| KEGG_PATHWAY | hsa04360:Axon guidance                                             | 12    | 1.44057623  | 0.015060172 | ABLIM1, EPHA4, EPHB6, NRP1, UNC5B, SEMA3G, SEMA4B, ROBO2, PAK1, CXCL12, ITGB1, SLIT3                                                                                                      | 285        | 17.76654834 |
| KEGG_PATHWAY | hsa04010:MAPK signaling pathway                                    | 19    | 2.280912365 | 0.017415329 | FGFR3, RELA, TGFBR1, TGFBR2, HSPA1L, MAP3K6, MAX, MAP3K5, DUSP3, RASGRF2, ARRB2, NTRK2, IL1B, PAK1, IKKB, RAPGEF2, CD14, DUSP7, DUSP6                                                     | 285        | 20.26551362 |
| KEGG_PATHWAY | hsa05132:Salmonella infection                                      | 9     | 1.080432173 | 0.020172309 | CXCL1, RAB7B, MYD88, KLC1, CXCL3, RELA, CXCL2, IL1B, CD14                                                                                                                                 | 285        | 23.10176256 |
| KEGG_PATHWAY | hsa04610:Complement and coagulation cascades                       | 8     | 0.960384154 | 0.022513972 | PLAT, C7, VWF, CD55, F10, F5, F8, PROS1                                                                                                                                                   | 285        | 25.43734959 |
| KEGG_PATHWAY | hsa04145:Phagosome                                                 | 13    | 1.56062425  | 0.023281115 | MARCO, RAB7B, RAB5A, ITGB5, VAMP3, HLA-B, HLA-DPB1, HLA-E, FCGR3B, ITGB1, CD14, THBS4, CLEC4M                                                                                             | 285        | 26.18815507 |
| BIOCARTA     | h_tollPathway:Toll-Like Receptor Pathway                           | 7     | 0.840336134 | 0.026983639 | MYD88, RELA, TLR3, EIF2AK2, IKKB, TLR7, CD14                                                                                                                                              | 102        | 28.86324654 |
| KEGG_PATHWAY | hsa04810:Regulation of actin cytoskeleton                          | 16    | 1.920768307 | 0.027059516 | ARHGEF4, FGD1, FGFR3, SSH3, IQGAP2, ITGB5, ACTN2, ITGB1, ITGA6, ITGA8, ITGB7, ITGA7, ITGAD, PAK1, CD14, FGD3                                                                              | 285        | 29.7853792  |

\*Only showing results with a false discovery rate (FDR) ≤30%.

**Table S7: DAVID analysis of genes encompassed in AITL deletions in ≥4 cases.**

| Category     | Term                                                                             | Count | %            | PValue      | Genes                                                                                                  | List Total | FDR         |
|--------------|----------------------------------------------------------------------------------|-------|--------------|-------------|--------------------------------------------------------------------------------------------------------|------------|-------------|
| KEGG_PATHWAY | hsa04150:mTOR signaling pathway                                                  | 9     | 2.102803738  | 4.97E-05    | PDPK1, AKT1S1, STK11, TSC2, RHEB, MLST8, RPTOR, AKT2, PIK3R2                                           | 161        | 0.061865193 |
| KEGG_PATHWAY | hsa04152:AMPK signaling pathway                                                  | 11    | 2.570093458  | 4.97E-04    | PDPK1, CCND1, AKT1S1, STK11, TSC2, RHEB, PPP2R2D, RPTOR, LIPE, AKT2, PIK3R2                            | 161        | 0.616785503 |
| KEGG_PATHWAY | hsa05223:Non-small cell lung cancer                                              | 7     | 1.635514019  | 0.001750136 | PDPK1, CCND1, RASSF1, ERBB2, CDK4, AKT2, PIK3R2                                                        | 161        | 2.157245733 |
| KEGG_PATHWAY | hsa05213:Endometrial cancer                                                      | 6     | 1.4018669159 | 0.006759157 | PDPK1, CCND1, ERBB2, AXIN1, AKT2, PIK3R2                                                               | 161        | 8.097153234 |
| KEGG_PATHWAY | hsa00532:Glycosaminoglycan biosynthesis - chondroitin sulfate / dermatan sulfate | 4     | 0.934579439  | 0.010398619 | B3GALT6, XYLT2, CHST12, CSGALNACT2                                                                     | 161        | 12.20293884 |
| KEGG_PATHWAY | hsa04910:Insulin signaling pathway                                               | 9     | 2.102803738  | 0.014496937 | PDPK1, PRKAR1B, TSC2, RHEB, CRK, RPTOR, LIPE, AKT2, PIK3R2                                             | 161        | 16.62402902 |
| KEGG_PATHWAY | hsa04919:Thyroid hormone signaling pathway                                       | 8     | 1.869158879  | 0.01628165  | PDPK1, CCND1, NCOA3, TSC2, RHEB, AKT2, MED1, PIK3R2                                                    | 161        | 18.48452256 |
| KEGG_PATHWAY | hsa04932:Non-alcoholic fatty liver disease (NAFLD)                               | 9     | 2.102803738  | 0.023621441 | NDUFS7, SDHB, NDUFA3, UQCR11, GSK3A, COX4I1, DDIT3, AKT2, PIK3R2                                       | 161        | 25.74161578 |
| KEGG_PATHWAY | hsa04151:PI3K-Akt signaling pathway                                              | 15    | 3.504672897  | 0.028552244 | PHLPP1, PDGFA, STK11, CDK4, YWHAE, RPTOR, CCND1, PDPK1, PKN3, TSC2, RHEB, MLST8, PPP2R2D, AKT2, PIK3R2 | 161        | 30.27792437 |
| KEGG_PATHWAY | hsa05231:Choline metabolism in cancer                                            | 7     | 1.635514019  | 0.029295197 | PDPK1, PDGFA, TSC2, WASF2, RHEB, AKT2, PIK3R2                                                          | 161        | 30.93890117 |

\*Only showing results with a false discovery rate (FDR) ≤30%.

**Table S8: DAVID analysis of genes encompassed in gains or deletions in at least 3 cases with concordant significant changes in mRNA expression in PTCL-GATA3.**

| Genes in CN gains/amplification with significantly increased mRNA expression              |                                                      |       |             |             |                                                                                                                                                                                                                                             |            |             |
|-------------------------------------------------------------------------------------------|------------------------------------------------------|-------|-------------|-------------|---------------------------------------------------------------------------------------------------------------------------------------------------------------------------------------------------------------------------------------------|------------|-------------|
| Category                                                                                  | Term                                                 | Count | %           | PValue      | Genes                                                                                                                                                                                                                                       | List Total | FDR         |
| KEGG_PATHWAY                                                                              | hsa03040:Spliceosome                                 | 23    | 1.379724055 | 5.73E-04    | SRSF1, DHX8, PRPF31, CRNKL1, LSM8, CCDC12, U2AF2, EFTUD2, U2SURP, SNRPD2, DDX5, SF3A2, BUD31, HNRNPM, RBM8A, ISY1, U2AF1, LSM5, SNRPE, THOC1, RBM17, DD42, TXNL4A                                                                           | 541        | 0.753841093 |
| KEGG_PATHWAY                                                                              | hsa03460:Fanconi anemia pathway                      | 13    | 0.779844031 | 6.27E-04    | FANCL, SLX4, FAAP100, POLI, FANCD2, TLO2, RMI2, PALB2, ERCC4, UBE2T, BRCA1, ERCC1, TOP3B                                                                                                                                                    | 541        | 0.825367402 |
| KEGG_PATHWAY                                                                              | hsa03010:Ribosome                                    | 23    | 1.379724055 | 7.82E-04    | RPL18, MRPS17, RPL19, RPL14, RPL15, RPL27, RPS15A, MRPS5, MRPL9, RPS2, MRPL30, MRPL20, RPL29, MRPL24, MRPL10, MRPL15, MRPS9, RPL7, RPL32, RPL31, RPL8, MRPL32, RPS27A                                                                       | 541        | 1.028467351 |
| KEGG_PATHWAY                                                                              | hsa04070:Phosphatidylinositol signaling system       | 17    | 1.019796041 | 0.003572098 | PRKCA, PIK3CG, IMPAD1, CDIPT, SYNJ1, PIP5K1C, PI4KB, MTMR3, MTMR14, DGKB, DGKE, PLCD1, INPP4A, PIP4K2A, IP6K1, PIP4K2B, IP6K2                                                                                                               | 541        | 4.616423374 |
| KEGG_PATHWAY                                                                              | hsa03050:Proteasome                                  | 10    | 0.599880024 | 0.006069154 | PSMA2, PSMB4, PSMC5, PSMC2, PSMD2, PSMD3, PSMD4, PSME3, PSME4, PSMD6                                                                                                                                                                        | 541        | 7.725651335 |
| KEGG_PATHWAY                                                                              | hsa04144:Endocytosis                                 | 32    | 1.919616077 | 0.010164351 | RAB7A, CLTB, CYTH1, RAB5C, CHMP4B, AP2S1, CHMP7, ASAP1, PIP5K1C, ARF5, ARFGEF2, ARFGF1, AP2B1, WWP1, SNF8, WIPF2, VPS4B, NEDD4L, AGAP3, IL2RB, VPS45, PSD4, RAB11FIP4, ARPC1B, RAB11FIP5, RAB22A, HGS, SMURF2, PDCD6IP, VPS28, EPN1, SH3GL1 | 541        | 12.62272601 |
| KEGG_PATHWAY                                                                              | hsa01230:Biosynthesis of amino acids                 | 13    | 0.779844031 | 0.011497155 | ALDOA, BCAT2, MAT2A, ALDOB, PFKF, PGAM2, TKT, PSPH, GOT2, PKLR, MTR, RPIA, CBS                                                                                                                                                              | 541        | 14.16394343 |
| KEGG_PATHWAY                                                                              | hsa05169:Epstein-Barr virus infection                | 25    | 1.49970006  | 0.012586442 | POLR2H, PIK3CG, USP7, ITGAL, YWHAZ, CREBBP, AKAP8L, POLR3GL, POLR3C, STAT3, TRADD, HDAC5, GTF2E1, PSMC5, BCL2, SND1, PSMC2, GSK3B, PSMD2, PSMD3, PSMD4, PRKACA, PSMD6, RBPJL, MYC                                                           | 541        | 15.40486242 |
| KEGG_PATHWAY                                                                              | hsa04932:Non-alcoholic fatty liver disease (NAFLD)   | 21    | 1.25974805  | 0.013359423 | PIK3CG, UQCRC2, NDUFA5, NDUFB4, PPARA, NDUFA3, NDUFB10, UQCRC1, NDUFB9, NDUFAB1, NDUFA13, IL6R, COX5B, NDUFB2, NDUFA11, ATF4, GSK3B, MLX, PKLR, ERN1, UQCRCB                                                                                | 541        | 16.27536359 |
| KEGG_PATHWAY                                                                              | hsa05012:Parkinson's disease                         | 20    | 1.199760048 | 0.014144381 | UQCRC2, NDUFA5, NDUFB4, NDUFA3, NDUFB10, UQCRC1, NDUFB9, ADCY5, UBE2G2, TH, NDUFAB1, NDUFA13, UBE2J2, COX5B, NDUFB2, NDUFA11, ATP5C1, PRKACA, SLC18A1, UQCRCB                                                                               | 541        | 17.15087363 |
| KEGG_PATHWAY                                                                              | hsa05016:Huntington's disease                        | 25    | 1.49970006  | 0.014203676 | POLR2H, UQCRC2, NDUFB4, CLTB, UQCRC1, AP2S1, NDUFB9, NDUFAB1, COX5B, NDUFB2, AP2B1, CREB3L3, NDUFA5, NDUFA3, NDUFB10, TAF4B, CREBBP, NDUFA13, UCP1, SOD1, DNAI2, DCTN1, NDUFA11, ATP5C1, UQCRCB                                             | 541        | 17.21666406 |
| KEGG_PATHWAY                                                                              | hsa00562:Inositol phosphate metabolism               | 12    | 0.719856029 | 0.020926271 | PIK3CG, MTMR3, CDIPT, IMPAD1, MTMR14, SYNJ1, PIP5K1C, PLCD1, PI4KB, INPP4A, PIP4K2A, PIP4K2B                                                                                                                                                | 541        | 24.3703259  |
| KEGG_PATHWAY                                                                              | hsa00270:Cysteine and methionine metabolism          | 8     | 0.479904019 | 0.025782682 | GOT2, MRI1, DNMT3A, MAT2A, MTR, MDH2, CBS, MPST                                                                                                                                                                                             | 541        | 29.17779486 |
| Genes in CN heterozygous/homozygous deletion with significantly increased mRNA expression |                                                      |       |             |             |                                                                                                                                                                                                                                             |            |             |
| Category                                                                                  | Term                                                 | Count | %           | PValue      | Genes                                                                                                                                                                                                                                       | List Total | FDR         |
| KEGG_PATHWAY                                                                              | hsa03018:RNA degradation                             | 16    | 1.123595506 | 4.09E-04    | EXOSC8, EXOSC9, SKIV2L, LSM7, CNOT2, CNOT1, PAPP5, DIS3L, CNOT7, DIS3, WDR61, DCP2, DCP1B, LSM2, XRN1, HSPA9                                                                                                                                | 510        | 0.536963292 |
| KEGG_PATHWAY                                                                              | hsa04141:Protein processing in endoplasmic reticulum | 23    | 1.615168539 | 0.006087651 | P4HB, SEC24A, UBE4B, ERP29, SKP1, UBQLN1, ERLEC1, PLAA, HSPH1, BAK1, HSP90B1, SEC61B, UBE2D2, BAG1, VCP, BAG2, DNAJA1, DAD1, DNAJC5, AMFR, DNAJC3, UGGT1, EIF2AK4                                                                           | 510        | 7.719010106 |
| KEGG_PATHWAY                                                                              | hsa03013:RNA transport                               | 23    | 1.615168539 | 0.007481857 | XPOT, NCBP1, RAN, NUP88, STRAP, SNUPN, SAP18, NUP93, UBE2I, PYM1, EIF2B1, RPP14, EIF4B, PHAX, EIF4G3, SUMO1, EIF3A, NUP37, EIF3J, NUP107, NUP35, EIF2B4, NUP58                                                                              | 510        | 9.407529238 |
| KEGG_PATHWAY                                                                              | hsa04120:Ubiquitin mediated proteolysis              | 19    | 1.334269663 | 0.011343888 | FZR1, ANAPC5, UBE3A, UBE4B, BIRC6, UBE2I, SKP1, UBE2Q2, UBE2B, UBE2N, CUL3, RNFB7, UBE2D2, CUL4A, UBE2K, WWP2, KLHL9, DET1, MDM2                                                                                                            | 510        | 13.9369154  |
| KEGG_PATHWAY                                                                              | hsa04662:B cell receptor signaling pathway           | 12    | 0.842696629 | 0.011383638 | KRAS, LYN, DAPP1, PIK3CB, PLCG2, PPP3CB, PPP3CC, NFKBIA, PPP3CA, CD72, BLNK, SYK                                                                                                                                                            | 510        | 13.98242639 |
| BIOCARTA                                                                                  | h_fasPathway:FAS signaling pathway ( CD95 )          | 8     | 0.561797753 | 0.017514835 | CFLAR, PAK2, LMNB1, DFFB, CASP8, MAP2K4, LMNA, DAXX                                                                                                                                                                                         | 143        | 19.82251104 |
| BIOCARTA                                                                                  | h_ctcfPathway:CTCF: First Multivalent Nuclear Factor | 7     | 0.491573034 | 0.017576458 | CDKN2A, PPP2CA, TGFBR1, TGFBR3, MDM2, CTCF, PTEN                                                                                                                                                                                            | 143        | 19.88536351 |
| KEGG_PATHWAY                                                                              | hsa04720:Long-term potentiation                      | 11    | 0.77247191  | 0.021595028 | KRAS, GRIN2B, CAMK4, PPP3CB, PPP3CC, RAP1B, PPP3CA, ITPR3, CACNA1C, PPP1CC, ITPR2                                                                                                                                                           | 510        | 24.96458584 |
| KEGG_PATHWAY                                                                              | hsa05169:Epstein-Barr virus infection                | 23    | 1.615168539 | 0.02225396  | POLR2E, LYN, RAN, POLR1D, PIK3CB, MAP2K4, NFKBIA, HLA-C, POLR2D, POLR2C, POLR3B, DDX58, CSNK2A2, GTF2E2, PSMC6, PLCG2, YWHAQ, MDM2, ENTPD1, PSMD7, TBPL1, EIF2AK4, SYK                                                                      | 510        | 25.62668771 |
| KEGG_PATHWAY                                                                              | hsa05016:Huntington's disease                        | 23    | 1.615168539 | 0.02476604  | ATP5D, CLTA, NDUFA2, POLR2E, UQCRC1, CREB3, NDUFA9, CREB1, ATP5B, CYC1, COX7A2L, VDAC2, POLR2D, POLR2C, DCTN4, NDUFA12, DCTN2, NDUFS7, GRIN2B, IFT57, CASP8, TBPL1, NDUFS1                                                                  | 510        | 28.10164842 |
| KEGG_PATHWAY                                                                              | hsa04931:Insulin resistance                          | 15    | 1.053370787 | 0.026493382 | SREBF1, CREB3, PIK3CB, CREB1, PRKAG1, NFKBIA, FOXO1, PPP1CC, PTEN, PTPN11, PPP1R3C, MGEA5, TBC1D4, PTPN1, SLC27A2                                                                                                                           | 510        | 29.75906901 |

\*Only showing results with a false discovery rate (FDR) < 30%.

**Table S9: DAVID analysis of genes encompassed in gains or deletions in at least 3 cases with concordant significant changes in mRNA expression in PTCL-TBX21.**

**Genes in CN gains/amplification with significantly increased mRNA expression**

| Category     | Term                                               | Count | %           | PValue      | Genes                                                                                      | List Total | FDR         |
|--------------|----------------------------------------------------|-------|-------------|-------------|--------------------------------------------------------------------------------------------|------------|-------------|
| KEGG_PATHWAY | hsa04650:Natural killer cell mediated cytotoxicity | 10    | 1.834862385 | 0.004910469 | PRKCA, PIK3CG, CD244, TNF, BRAF, RAC3, CD247, PPP3R1, ZAP70, FASLG                         | 184        | 6.103496152 |
| KEGG_PATHWAY | hsa03013:RNA transport                             | 12    | 2.201834862 | 0.005793264 | NCBP2, SENP2, EIF4A3, RBM8A, NUP205, NUP210, EIF4A2, ALYREF, CYFIP2, GEMIN7, RPP40, EIF2B5 | 184        | 7.163645897 |
| KEGG_PATHWAY | hsa03050:Proteasome                                | 6     | 1.100917431 | 0.005799913 | PSMB4, PSMD13, PSMD12, PSMB3, PSMD3, PSME4                                                 | 184        | 7.171588758 |
| KEGG_PATHWAY | hsa03040:Spliceosome                               | 10    | 1.834862385 | 0.008554753 | NCBP2, DHX8, EIF4A3, SRSF7, RBM8A, EFTUD2, ALYREF, U2AF1, PRPF3, SNRPG                     | 184        | 10.40909776 |
| KEGG_PATHWAY | hsa03010:Ribosome                                  | 9     | 1.651376147 | 0.027567684 | MRPL24, RPL19, MRPL12, MRPL27, RPL27, MRPL9, MRPS5, MRPS21, MRPS6                          | 184        | 30.0675863  |

**Genes in CN heterozygous/homozygous deletion with significantly increased mRNA expression**

| Category     | Term                                                                        | Count | %           | PValue      | Genes                                                             | List Total | FDR         |
|--------------|-----------------------------------------------------------------------------|-------|-------------|-------------|-------------------------------------------------------------------|------------|-------------|
| KEGG_PATHWAY | hsa04978:Mineral absorption                                                 | 7     | 0.770077008 | 0.006704217 | MT1M, MT2A, MT1E, MT1H, MT1X, MT1G, MT1F                          | 258        | 8.342341982 |
| KEGG_PATHWAY | hsa05032:Morphine addiction                                                 | 9     | 0.99009901  | 0.019483923 | GABRR2, OPRM1, PDE7B, GNAO1, GABRR1, GNG13, PDE10A, GRK5, CACNA1B | 258        | 22.49289608 |
| KEGG_PATHWAY | hsa04742:Taste transduction                                                 | 6     | 0.660066007 | 0.024856764 | TAS2R13, TAS2R50, TAS2R14, TAS2R19, GNG13, TAS1R1                 | 258        | 27.81621456 |
| BIOCARTA     | h_deathPathway:Induction of apoptosis through DR3 and DR4/5 Death Receptors | 5     | 0.550055006 | 0.029209455 | TNFRSF10A, CEP104, TNFRSF10B, TNFRSF25, DFFB                      | 60         | 28.46128816 |

\*Only showing results with a false discovery rate (FDR) ≤30%.

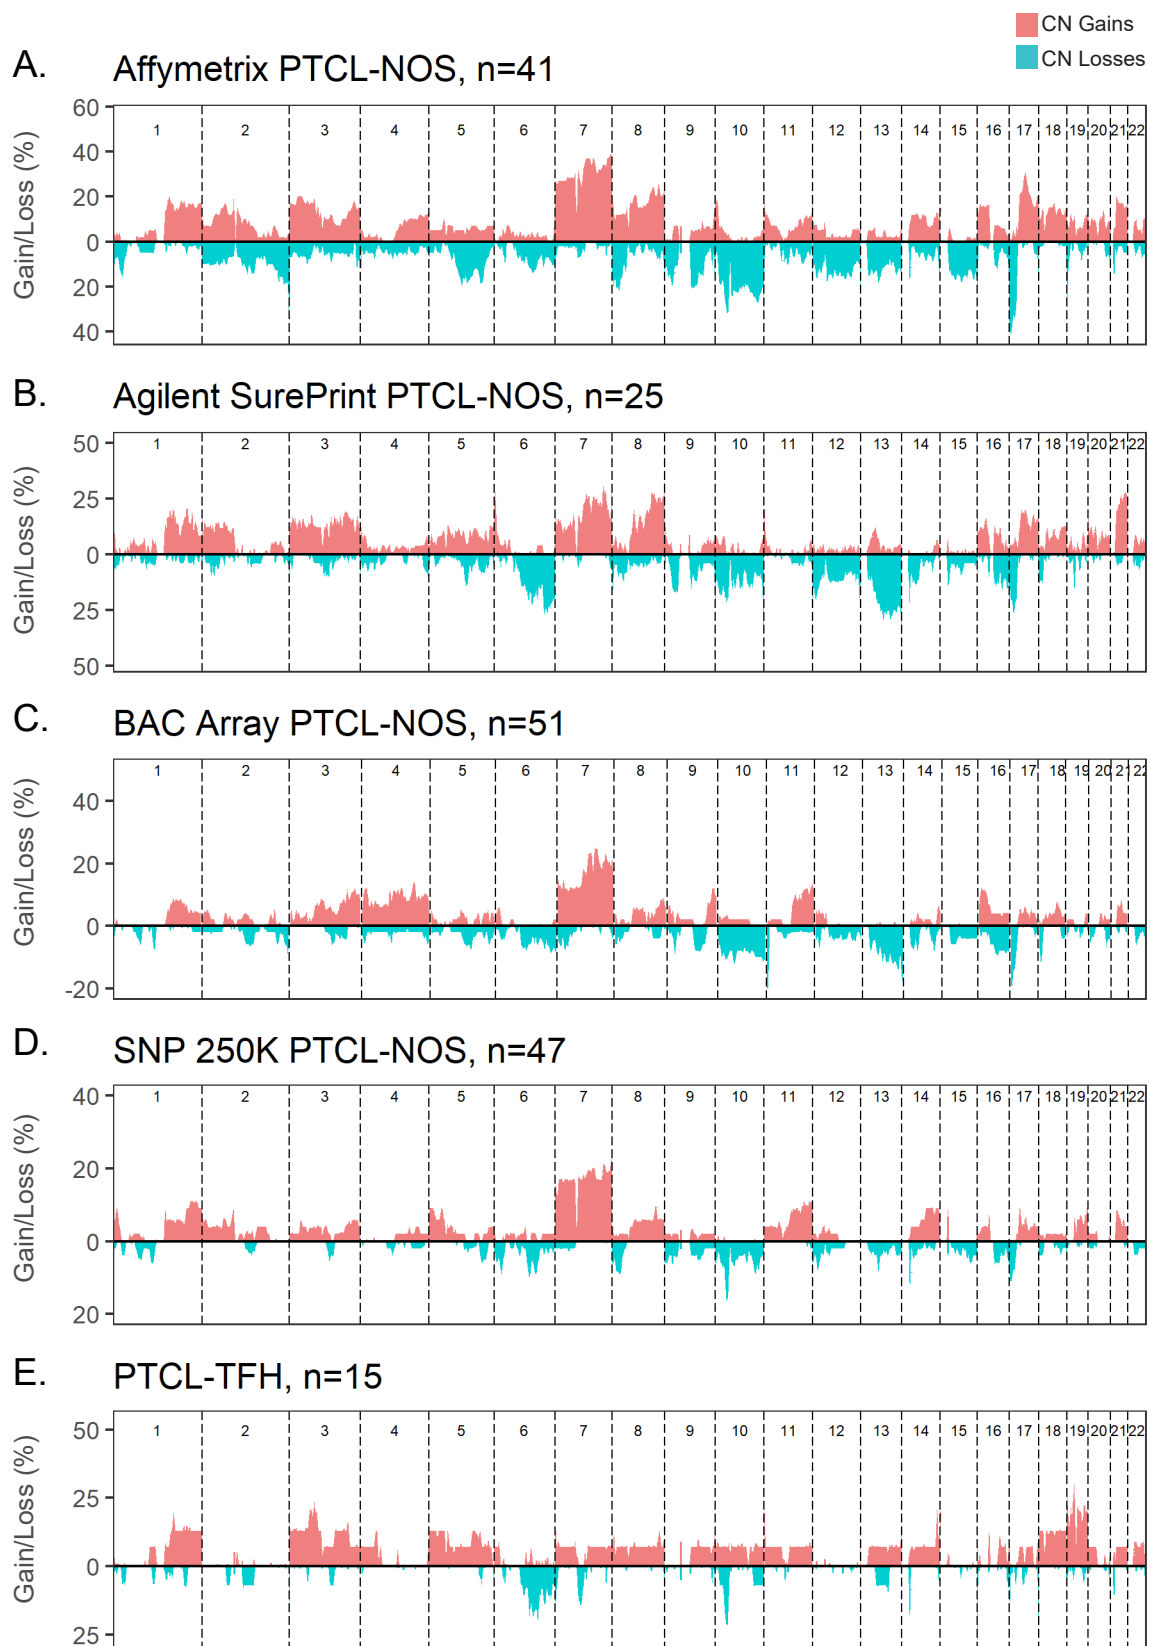

**Figure S1: Frequency of chromosomal aberrations observed in four different PTCL-NOS copy number data sets or PTCL-T<sub>FH</sub> cases.** **A.** CNAs were analyzed using the OncoScan or Nspl 250K platforms (Affymetrix) at UNMC. **B.** Cases from a previously published study which analyzed CNAs using the Agilent SurePrint array<sup>1</sup>. **C.** Cases from a previously published study which analyzed CNAs using a bacterial artificial chromosome (BAC) array<sup>2</sup>. **D.** Cases from a previously published study which analyzed CNAs using the Affymetrix Styl 250K platform<sup>3</sup>. **E.** PTCL-T<sub>FH</sub> cases identified by IHC or mRNA expression analysis and excluded from the PTCL-NOS group in accordance with the WHO 2016 classification scheme.



A.

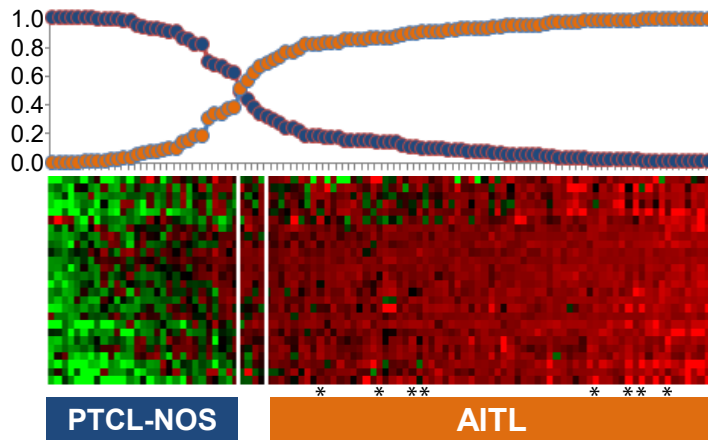

B.

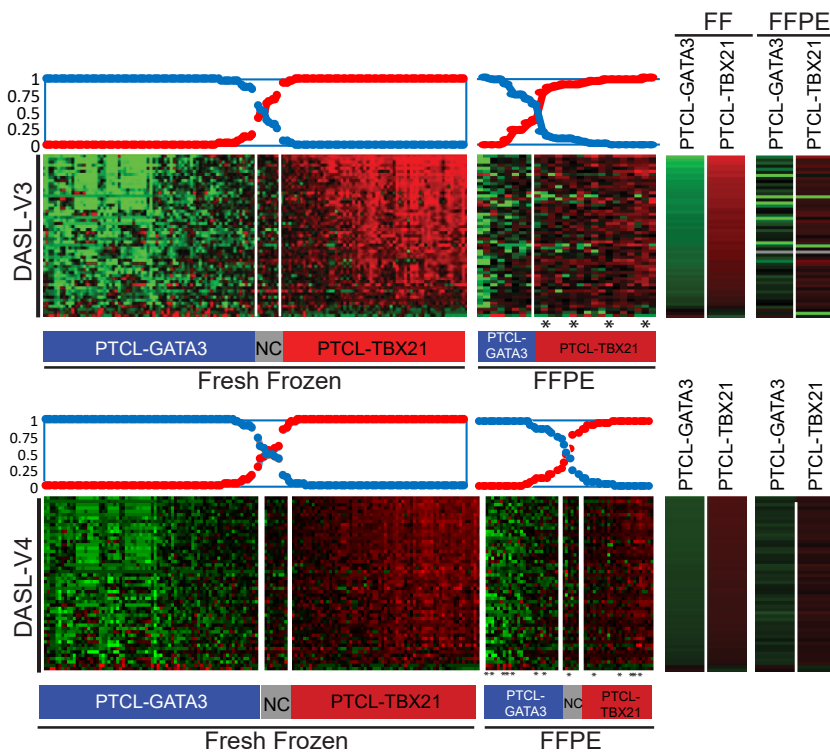

**Figure S2: Classification of PTCL entities and subgroups. A.** Analysis of the AITL signature genes identified on the Affymetrix HG-U133 Plus2 platform<sup>4,5</sup> in RNA sequencing data. The Bayesian predictor for AITL (orange) and PTCL-NOS (blue) entities are shown above the heatmap and the eight AITL cases included in the study are noted with an asterisk. **B.** PTCL-GATA3/TBX21 subgroup classification using signature genes generated from the Affymetrix HG-U133 Plus2 platform<sup>4,5</sup>. Robust classifier genes present in both Affymetrix and Illumina DASL V3 or DASL V4 platforms were used to molecularly classify FFPE PTCL-NOS cases<sup>6</sup>. The Bayesian predictor for GATA3 (blue) or TBX21 (red) subtypes are shown below the heatmaps and cases included in the study are marked with an asterisk. The Illumina HUMANREF 8\_V3\_0\_R1\_11282963\_A\_WGDASL (DASL V3) or Human HT 12\_V4\_0\_R2\_15002873\_B\_WGDASL (DASL V4) were available from a previously published dataset<sup>6</sup>.

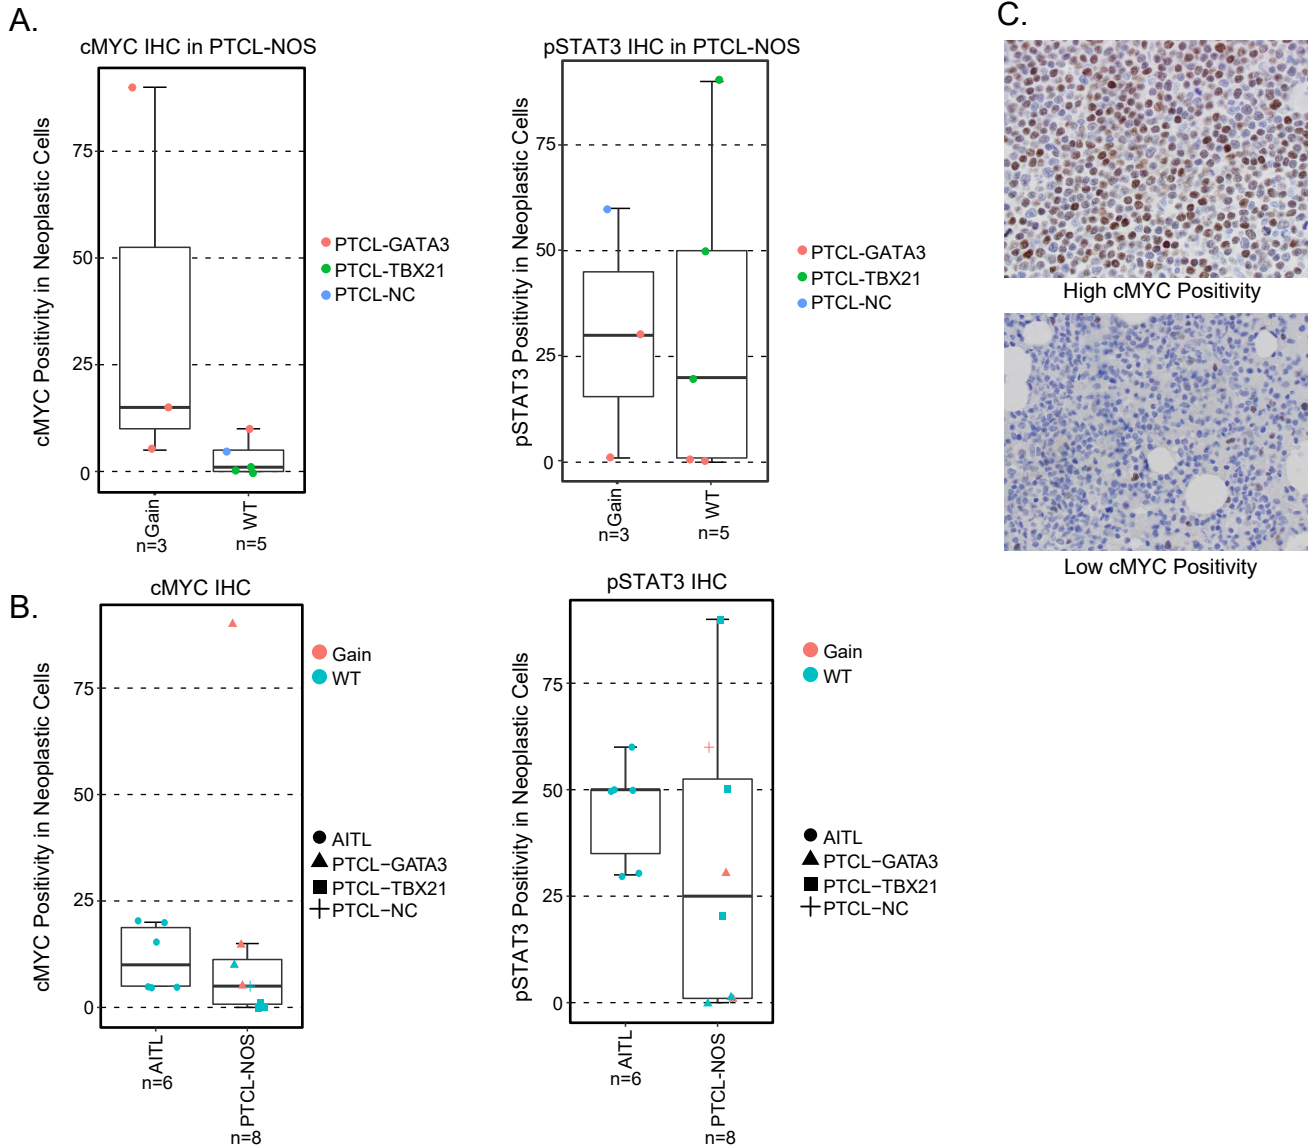

**Figure S3: Quantification of IHC staining of cMYC and pSTAT3. A.** Quantification of cMYC (left) and pSTAT3 (right) positivity in neoplastic cells by IHC in PTCL-NOS molecular subgroups delineated on the copy number state of MYC and STAT3, respectively. **B.** Quantification of cMYC (left) and pSTAT3 (right) positivity in neoplastic cells by IHC in AITL and molecular subgroups of PTCL-NOS. Colors delineate the copy number state of MYC and STAT3, respectively, and shapes depict the entity/subgroup. **C.** Representative IHC images (60x) from a highly cMYC positive and a lesser cMYC positive PTCL case.

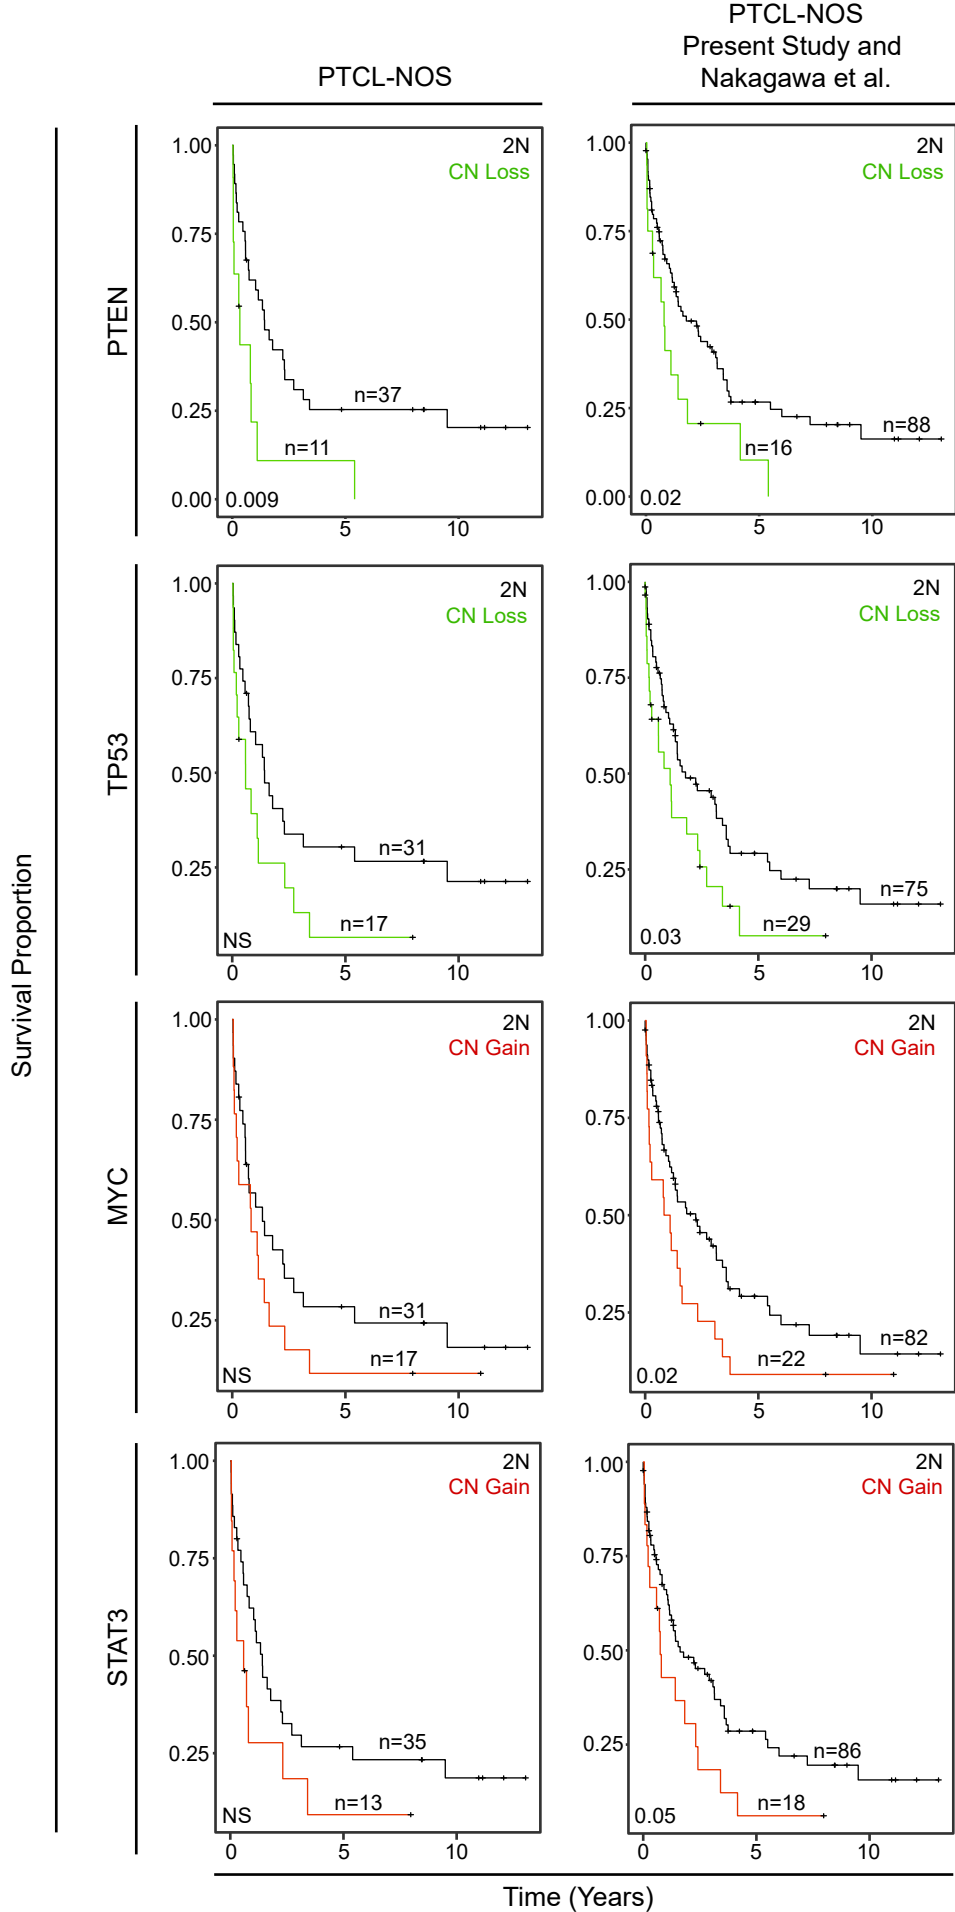

**Figure S4: Overall survival associations.** Kaplan-Meier curves comparing overall survival between cases with or without PTEN loss, TP53 loss, MYC gain, or STAT3 gain as indicated. The left column is comparing overall survival from the present PTCL-NOS cohort and the right column is comparing overall survival from the present PTCL-NOS cohort combined with a previously published PTCL-NOS cohort<sup>2</sup>.

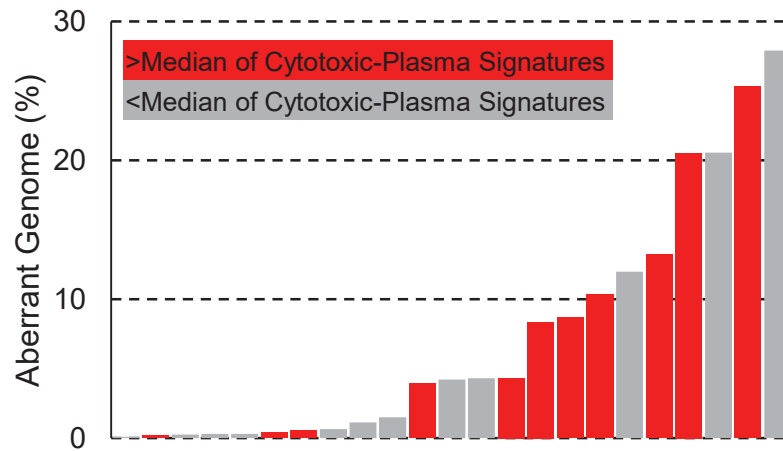

**Figure S5: Percent aberrant genome distribution of PTCL-TBX21 cases with increased expression of the cytotoxic signature.** The cytotoxic signature was calculated by finding the difference between the CD8+ cytotoxic and plasma cell signatures<sup>7</sup>. Red indicates cases with a cytotoxic signature greater than the median and gray represents cases with a cytotoxic signature lower than the median.

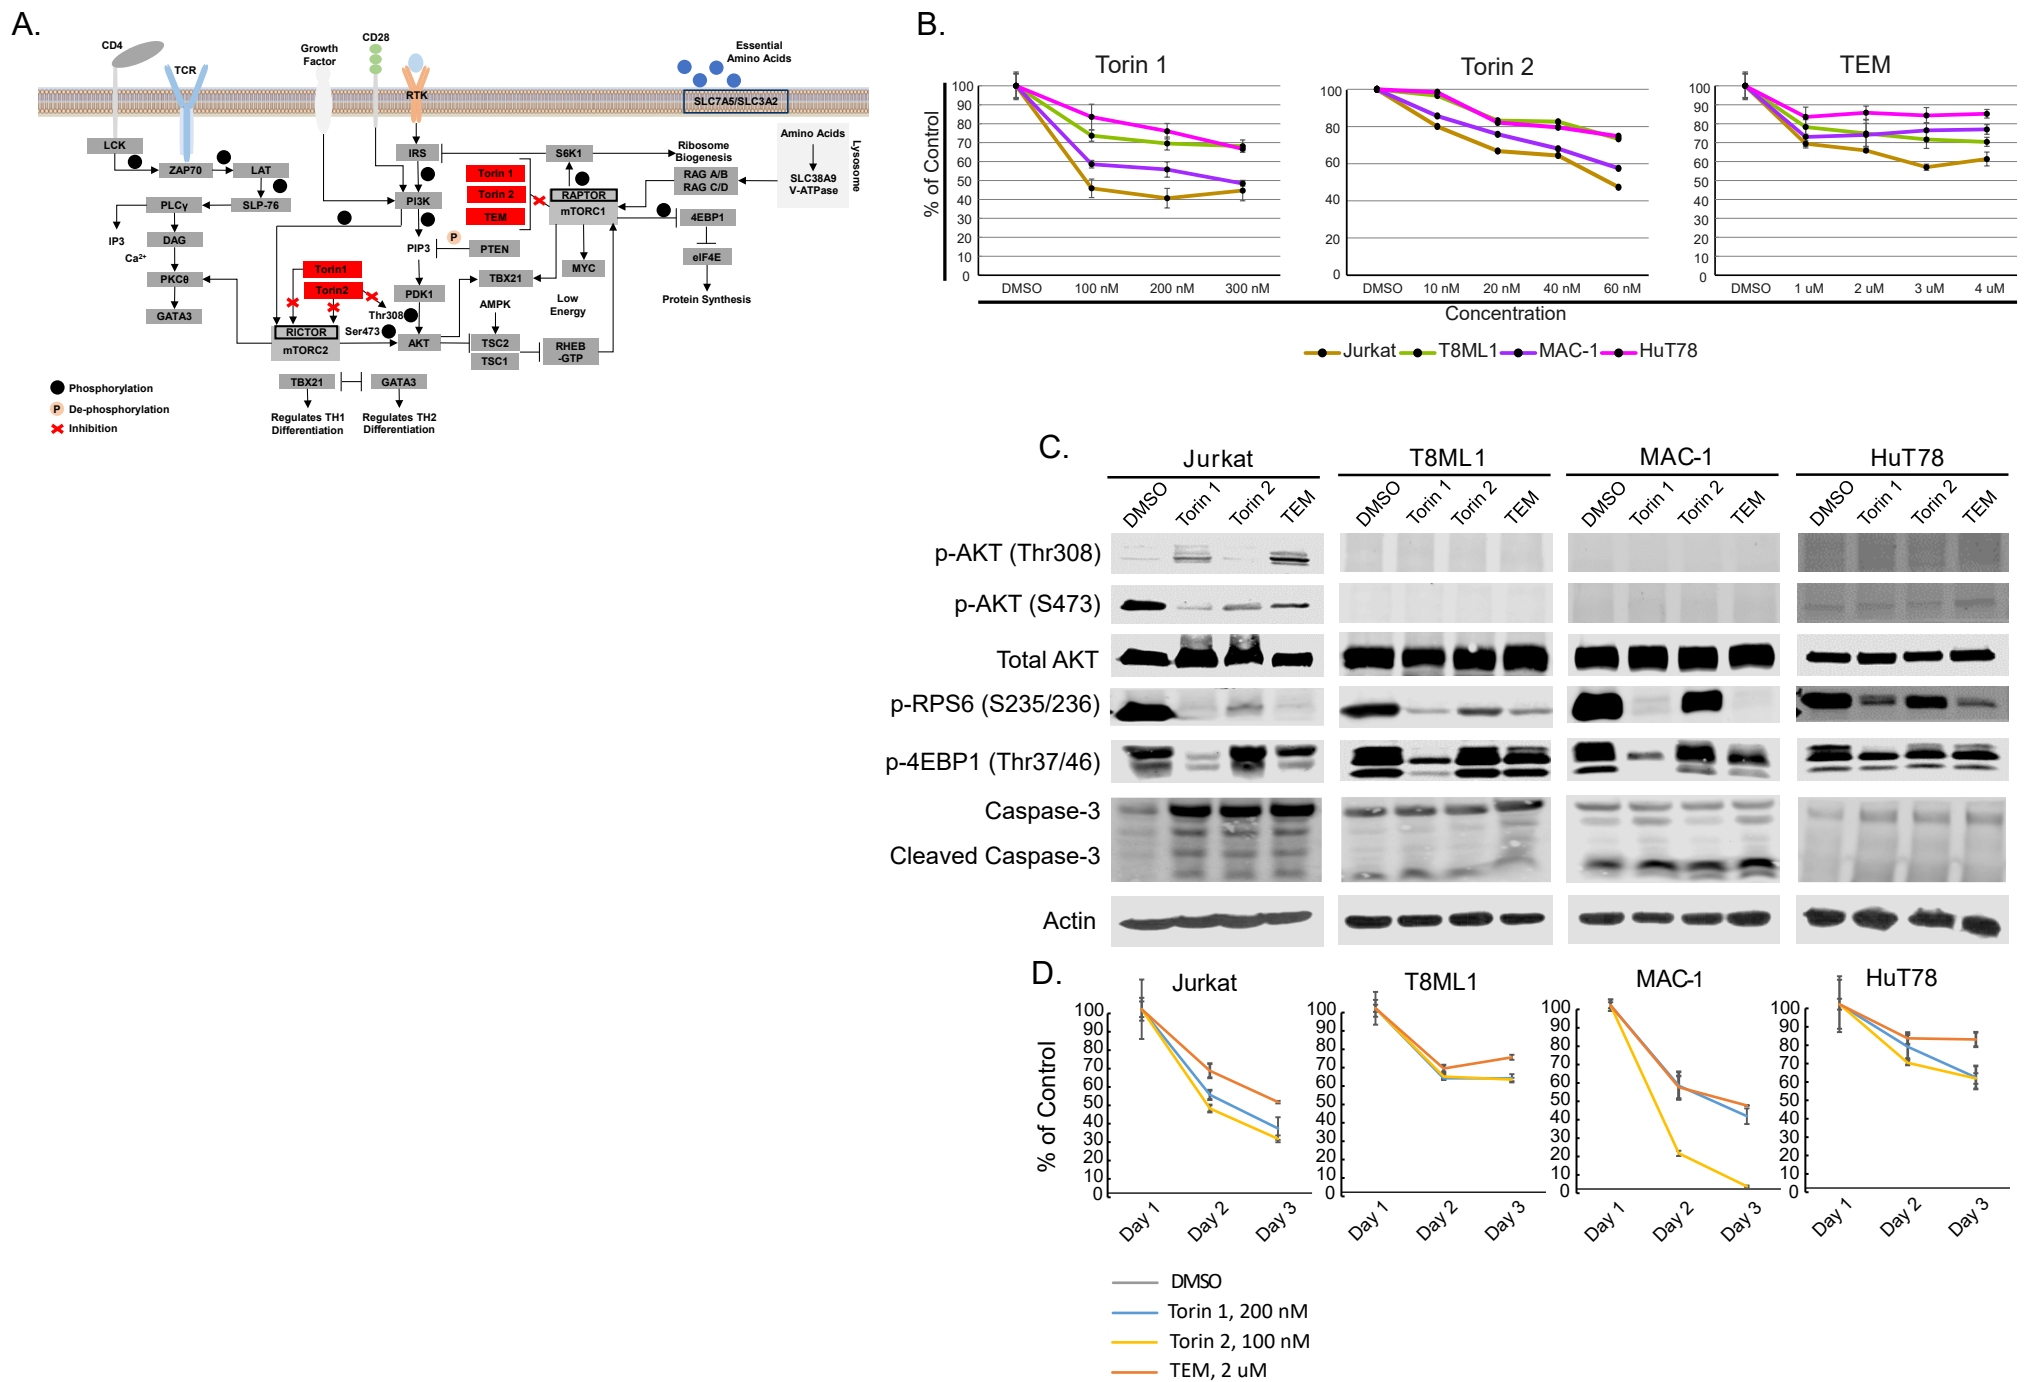

**Figure S6: mTOR inhibition in T cell lines. A.** mTOR schematic indicating targets of Torin 1, Torin 2, and Temozolomide. **B.** Drug dose response curve for four T-cell lymphoma cell lines (Jurkat, T8ML1, MAC-1, and HuT78) following 24 hours of mTOR inhibitor treatment at the indicated concentrations. **C.** Western blots of Jurkat, T8ML1, MAC-1 and HuT78 cells after treatment with control (DMSO), Torin 1 (200 nM), Torin 2 (100 nM), or TEM (2  $\mu$ M) for 48 hours. The inhibitors target core components of mTOR signaling and resulted in reduced phosphorylation of rapamycin-sensitive (RPS6S235) and insensitive (4EBP1T37/46) substrates of mTORC1 and mTORC2. A complex effect on AKT phosphorylation was observed in Jurkat with inhibition of AKT<sup>S473</sup> phosphorylation, but increased AKT<sup>Thr308</sup> phosphorylation, an effect observed with TEM and Torin1, but not with dual inhibitor Torin2. Increased cleavage of Caspase-3 upon drug treatment was prominent in Jurkat cells, indicating activation of the apoptotic pathway. **D.** PrestoBlue proliferation assay of Jurkat, T8ML1, MAC-1 and HuT78 after treatment with DMSO, Torin 1, Torin 2, or TEM at the doses depicted in the legend. Values were normalized to the control (DMSO). Jurkat cells were more sensitive to Torin1/2 compared to TEM, whereas MAC-1 was most sensitive to Torin2; T8ML1 and HuT78 were >50% viable at 48 hours. Cell lines were less sensitive to the FDA-approved mTOR inhibitor TEM, even at 2 $\mu$ M. Data presented represents one representative experiment of three independent experiments.

## References

1. Dobay MP, Lemonnier F, Missiaglia E, Bastard C, Vallois D, Jais JP, et al. Integrative clinicopathological and molecular analyses of angioimmunoblastic T-cell lymphoma and other nodal lymphomas of follicular helper T-cell origin. *Haematologica*. 2017;102(4):e148-e151.
2. Nakagawa M, Nakagawa-Oshiro A, Karnan S, Tagawa H, Utsunomiya A, Nakamura S, et al. Array comparative genomic hybridization analysis of PTCL-U reveals a distinct subgroup with genetic alterations similar to lymphoma-type adult T-cell leukemia/lymphoma. *Clin Cancer Res*. 2009;15(1):30-38.
3. Hartmann S, Gesk S, Scholtysik R, Kreuz M, Bug S, Vater I, et al. High resolution SNP array genomic profiling of peripheral T cell lymphomas, not otherwise specified, identifies a subgroup with chromosomal aberrations affecting the REL locus. *British journal of haematology*. 2010;148(3):402-412.
4. Iqbal J, Weisenburger DD, Greiner TC, Vose JM, McKeithan T, Kucuk C, et al. Molecular signatures to improve diagnosis in peripheral T-cell lymphoma and prognostication in angioimmunoblastic T-cell lymphoma. *Blood*. 2010;115(5):1026-1036.
5. Iqbal J, Wright G, Wang C, Rosenwald A, Gascoyne RD, Weisenburger DD, et al. Gene expression signatures delineate biological and prognostic subgroups in peripheral T-cell lymphoma. *Blood*. 2014;123(19):2915-2923.
6. Piccaluga PP, Fuligni F, De Leo A, Bertuzzi C, Rossi M, Bacci F, et al. Molecular profiling improves classification and prognostication of nodal peripheral T-cell lymphomas: results of a phase III diagnostic accuracy study. *J Clin Oncol*. 2013;31(24):3019-3025.
7. Newman AM, Liu CL, Green MR, Gentles AJ, Feng W, Xu Y, et al. Robust enumeration of cell subsets from tissue expression profiles. *Nat Methods*. 2015;12(5):453-457.
